# Supplementary material
Source: publisher figshare collection journal article supplement (https://springernature.figshare.com/ndownloader/files/38796195)
Supplement: Supplementary file 1 [file 38796195]

## Sheet: Fig2c
5≤n≤10	I	II	III	n≤100	I	II	III	n≤1000	I	II	III	n>1000	I	II	III
	0	1	0		0.511628	0.488372	0		0.585714	0.414286	0		0.622394	0.377606	0
	0	1	0		0.675676	0.324324	0		0.694444	0.305556	0		0.598324	0.401676	0
	0.4	0.6	0		0.638889	0.361111	0		0.579787	0.420213	0		0.56831	0.43169	0
	0.9	0.1	0		0.78125	0.21875	0		0	0.940171	0.059829		0.605735	0.394265	0
	0.8	0.2	0		0.533333	0.466667	0		0	0.966387	0.033613		0.591237	0.408763	0
	0.555556	0.444444	0		0.551724	0.448276	0		0	0.947761	0.052239		0.572644	0.427356	0
	0.625	0.375	0		0.333333	0.666667	0		0	0.929204	0.070796		0.628632	0.371368	0
	0.444444	0.555556	0		0.461538	0.538462	0		0	0.953947	0.046053		0.62237	0.37763	0
	0.666667	0.333333	0		0.888889	0.111111	0		0	0.950413	0.049587		0.50645	0.49355	0
	0	1	0		0.761905	0.238095	0		0	0.965753	0.034247		0.605976	0.394024	0
	0.555556	0.444444	0		0.7	0.3	0		0	0.963303	0.036697
	0	1	0		0.736842	0.263158	0		0	0.9701	0.0299
	0.625	0.375	0		0.55	0.45	0		0	0.954545	0.045455
	1	0	0		0.789474	0.210526	0		0	0.984496	0.015504
	0	1	0		0.736842	0.263158	0		0.626566	0.373434	0
	0	1	0		0.555556	0.444444	0		0	0.977477	0.022523
	0.375	0.625	0		0.894737	0.105263	0		0	0.970149	0.029851
	0	1	0		0.714286	0.285714	0		0	0.964844	0.035156
	0	1	0		0.466667	0.533333	0		0	0.936441	0.063559
	1	0	0		0.307692	0.692308	0		0	0.947761	0.052239
	0.428571	0.571429	0		0.5	0.5	0		0.537879	0.462121	0
	0.857143	0.142857	0		0.416667	0.583333	0		0.486022	0.513978	0
	0.428571	0.571429	0		0.333333	0.666667	0		0.596491	0.403509	0
	0.285714	0.714286	0		0.25	0.75	0		0	0.994152	0.005848
	0	1	0		0.583333	0.416667	0		0	0.948718	0.051282
	0.714286	0.285714	0		0.692308	0.307692	0		0	0.986532	0.013468
	0	1	0		0.75	0.25	0		0	0.963768	0.036232
	0	1	0		0.909091	0.090909	0		0	0.982301	0.017699
	0.428571	0.571429	0		0.545455	0.454545	0		0	0.966805	0.033195
	1	0	0		0.545455	0.454545	0		0.407449	0.592551	0
	0.571429	0.428571	0		0.4	0.6	0
	0.571429	0.428571	0		0.9	0.1	0
	0.833333	0.166667	0		0.8	0.2	0
	0.571429	0.428571	0		0.65	0.35	0
	0.166667	0.833333	0		0.5	0.5	0
	1	0	0		0.470588	0.529412	0
	1	0	0		0.416667	0.583333	0
	1	0	0		0	1	0
	1	0	0		0	1	0
	0.333333	0.666667	0		0	1	0
	0.5	0.5	0		0	1	0
	0.833333	0.166667	0		0	1	0
	0.444444	0.555556	0		0	1	0
	0.777778	0.222222	0		0	1	0
	0.375	0.625	0		0	1	0
	0.625	0.375	0		0	1	0
	0.25	0.75	0		0	1	0
	0.285714	0.714286	0		0	0.894737	0.105263
	0.285714	0.714286	0		0	1	0
	0.857143	0.142857	0		0	1	0
	0.714286	0.285714	0		0	1	0
	0	1	0		0	0.958333	0.041667
	0.428571	0.571429	0		0	0.952381	0.047619
	0.333333	0.666667	0		0	1	0
	0.166667	0.833333	0		0	1	0
	0.333333	0.666667	0		0	0.92	0.08
	0.333333	0.666667	0		0	0.857143	0.142857
	0.5	0.5	0		0	1	0
	0.166667	0.833333	0		0	1	0
	0.333333	0.666667	0		0	0.885714	0.114286
	0	1	0		0	0.970588	0.029412
	0	1	0		0	0.875	0.125
	0	1	0		0	0.904762	0.095238
	0	1	0		0	0.953125	0.046875
	0	1	0		0	0.942308	0.057692
	0	1	0		0	0.958333	0.041667
	0	1	0		0	0.933333	0.066667
	0	1	0		0	1	0
	0	1	0		0	1	0
	0	1	0		0	0.909091	0.090909
	0	1	0		0	0.8	0.2
	0	0.714286	0.285714		0	0.96875	0.03125
	0	1	0		0	1	0
	0	1	0		0	0.944444	0.055556
	0	1	0		0	0.933333	0.066667
	0	1	0		0	1	0
	0	0.857143	0.142857		0	0.9	0.1
	0	0.857143	0.142857		0	0.967742	0.032258
	0	1	0		0	1	0
	0	1	0		0	1	0
	0	1	0		0	1	0
	0	0.875	0.125		0	0.944444	0.055556
	0	1	0		0	1	0
	0	1	0		0	0.935484	0.064516
	0	1	0		0	0.571429	0.428571
	0	1	0		0	0.916667	0.083333
	0	1	0		0	0.909091	0.090909
	0	1	0		0	0.818182	0.181818
	0	0.875	0.125		0	1	0
	0	0.857143	0.142857		0	0.9	0.1
	0	1	0		0	0.96	0.04
	0	1	0		0	0.837838	0.162162
	0	0.75	0.25		0	0.894737	0.105263
	0	1	0		0	0.875	0.125
	0	1	0		0	0.9	0.1
	0	1	0		0	0	1
	0	0.875	0.125		0.732394	0.267606	0
	0	0.857143	0.142857		0.69697	0.30303	0
	0	0.777778	0.222222		0.653846	0.346154	0
	0	0.875	0.125		0.857143	0.142857	0
	0	1	0		0.636364	0.363636	0
	0	1	0		0.238095	0.761905	0
	0	1	0		0.8	0.2	0
	0	1	0		0.315789	0.684211	0
	0	0.833333	0.166667		0.722222	0.277778	0
	0	1	0		0.6	0.4	0
	0	1	0		0.692308	0.307692	0
	0	0.833333	0.166667		0.230769	0.769231	0
	0	0.833333	0.166667		0.75	0.25	0
	0	1	0		1	0	0
	0	1	0		0.5	0.5	0
	0	1	0		0.9	0.1	0
	0	1	0		0.6	0.4	0
	0	0.875	0.125		0.5	0.5	0
	0	1	0		0.363636	0.636364	0
	0	1	0		0.1	0.9	0
	0	1	0		0.24	0.76	0
	0	0.833333	0.166667		0.111111	0.888889	0
	0	1	0		0.833333	0.166667	0
	0	1	0		0.6	0.4	0
	0	1	0		0	0.97619	0.02381
	0	0.8	0.2		0	1	0
	0	1	0		0	1	0
	0	0.833333	0.166667		0	1	0
	0	1	0		0	0.985294	0.014706
	0	1	0		0	1	0
	0	1	0		0	0.933333	0.066667
	0	1	0		0	1	0
	0	0.888889	0.111111		0	0.916667	0.083333
	0	0.9	0.1		0	0.7	0.3
	0	0.875	0.125		0	0.863636	0.136364
	0	1	0		0	1	0
	0	1	0		0	1	0
	0	1	0		0	1	0
	0	1	0		0	0.969697	0.030303
	0	0.9	0.1		0	1	0
	0	0.777778	0.222222		0	1	0
	0	1	0		0	0.8	0.2
	0	1	0		0	1	0
	0	1	0		0	0.846154	0.153846
	0	0.833333	0.166667		0	0.958333	0.041667
	0	0.9	0.1		0	1	0
	0	0.888889	0.111111		0	1	0
	0	1	0		0	1	0
	0	1	0		0	0.95	0.05
	0	1	0		0	0.8	0.2
	0	0.666667	0.333333		0	0	1
	0	0	1		0	0	1
	0	0.625	0.375		0	1	0
	0	1	0		0	1	0
	0	1	0		0	1	0
	0.9	0.1	0		0	0.909091	0.090909
	0.6	0.4	0		0	0.9	0.1
	0.5	0.5	0		0	1	0
	0.444444	0.555556	0		0	1	0
	0.777778	0.222222	0		0	1	0
	0.1	0.9	0		0	1	0
	0.222222	0.777778	0		0	1	0
	0.875	0.125	0		0	0.984848	0.015152
	0.875	0.125	0		0	0.964286	0.035714
	0.888889	0.111111	0		0	0.857143	0.142857
	0.125	0.875	0		0	1	0
	0.5	0.5	0		0.773585	0.226415	0
	1	0	0		0.666667	0.333333	0
	0.875	0.125	0		0.517241	0.482759	0
	0.125	0.875	0		0.615385	0.384615	0
	0.857143	0.142857	0		0.8	0.2	0
	0.428571	0.571429	0		0.285714	0.714286	0
	0	1	0		0.652174	0.347826	0
	0.857143	0.142857	0		0.55	0.45	0
	1	0	0		0.952381	0.047619	0
	0	1	0		0.388889	0.611111	0
	1	0	0		0.470588	0.529412	0
	1	0	0		0.588235	0.411765	0
	0.833333	0.166667	0		0.529412	0.470588	0
	0.5	0.5	0		0.823529	0.176471	0
	0	1	0		0.5625	0.4375	0
	0.857143	0.142857	0		0.428571	0.571429	0
	0.666667	0.333333	0		0.4	0.6	0
	1	0	0		0.214286	0.785714	0
	1	0	0		0.923077	0.076923	0
	0.6	0.4	0		0.5	0.5	0
	0.875	0.125	0		0.615385	0.384615	0
	0	1	0		0.615385	0.384615	0
	1	0	0		0.090909	0.909091	0
	0.5	0.5	0		0.25	0.75	0
	0	1	0		1	0	0
	0	1	0		0.833333	0.166667	0
	1	0	0		0.4	0.6	0
	0.833333	0.166667	0		0.9	0.1	0
	0.833333	0.166667	0		0.9	0.1	0
	1	0	0		0.526316	0.473684	0
	0	1	0		0.444444	0.555556	0
	0	1	0		0	0.875	0.125
	0	1	0		0	1	0
	0	1	0		0	1	0
	0	1	0		0	1	0
	0	1	0		0	1	0
	0	1	0		0	1	0
	0	0.833333	0.166667		0	1	0
	0	1	0		0	0.882353	0.117647
	0	0.7	0.3		0	0.866667	0.133333
	0	0.888889	0.111111		0	1	0
	0	1	0		0	0.75	0.25
	0	0.857143	0.142857		0	1	0
	0	1	0		0	0.8	0.2
	0	1	0		0	0.9	0.1
	0	1	0		0	1	0
	0	1	0		0	1	0
	0	1	0		0	0.884615	0.115385
	0	1	0		0	1	0
	0	0.8	0.2		0	0.966667	0.033333
	0	1	0		0	0.958333	0.041667
	0	0.777778	0.222222		0	0.973684	0.026316
	0	1	0		0	0.96	0.04
	0	0.714286	0.285714		0	1	0
	0	1	0		0	1	0
	0	1	0		0	1	0
	0	1	0		0	0.909091	0.090909
	0	1	0		0	0.9	0.1
	0	1	0		0	1	0
	0	1	0		0	1	0
	0	1	0		0	0.941176	0.058824
	0	1	0		0	1	0
	0	1	0		0	0.923077	0.076923
	0	1	0		0	1	0
	0	1	0		0	1	0
	0	1	0		0	0.9	0.1
	0	1	0		0	0.9	0.1
	0	1	0		0	0.961538	0.038462
	0	1	0		0	1	0
	0	1	0		0	0.884615	0.115385
	0	1	0		0	1	0
	0	1	0		0	0.933333	0.066667
	0	1	0		0	1	0
	0	0.8	0.2		0	0.9375	0.0625
	0	1	0		0	1	0
	0	0.875	0.125		0.565217	0.434783	0
	0	0.857143	0.142857		0.73913	0.26087	0
	0	0.625	0.375		0.913043	0.086957	0
	0	0	1		0.421053	0.578947	0
	0	0	1		0.882353	0.117647	0
	0	1	0		0.35	0.65	0
	0	1	0		0.571429	0.428571	0
	0	1	0		0.8125	0.1875	0
	0	0.857143	0.142857		0.538462	0.461538	0
	0	1	0		0.583333	0.416667	0
	0	1	0		0.454545	0.545455	0
	0	1	0		0.916667	0.083333	0
	0	1	0		0.583333	0.416667	0
	0	1	0		0.454545	0.545455	0
	0	1	0		0.272727	0.727273	0
	0	1	0		0.9	0.1	0
	0	1	0		0.8	0.2	0
	0	1	0		0.6	0.4	0
	0	1	0		0.52381	0.47619	0
	0	1	0		0	1	0
	0	1	0		0	1	0
	0	1	0		0	0.982143	0.017857
	0	1	0		0	0.956522	0.043478
	0	1	0		0	1	0
	0	0.666667	0.333333		0	1	0
	0	1	0		0	0.9	0.1
	0	1	0		0	1	0
	0.4	0.6	0		0	0.97561	0.02439
	0.111111	0.888889	0		0	1	0
	0.111111	0.888889	0		0	1	0
	0.9	0.1	0		0	1	0
	0.444444	0.555556	0		0	1	0
	0.222222	0.777778	0		0	0.923077	0.076923
	0.9	0.1	0		0	1	0
	0.444444	0.555556	0		0	1	0
	0.25	0.75	0		0	1	0
	0.333333	0.666667	0		0	0.846154	0.153846
	0.5	0.5	0		0	0.909091	0.090909
	0.375	0.625	0		0	1	0
	0.875	0.125	0		0	0.9	0.1
	0.571429	0.428571	0		0	0.9	0.1
	0.166667	0.833333	0		0	0.833333	0.166667
	0	1	0		0	0	1
	0.666667	0.333333	0		0	1	0
	0.833333	0.166667	0		0	0.964286	0.035714
	0.666667	0.333333	0		0	1	0
	0.375	0.625	0		0	1	0
	0.5	0.5	0		0	0.857143	0.142857
	0.142857	0.857143	0		0	0.954545	0.045455
	1	0	0		0	1	0
	1	0	0		0	0.916667	0.083333
	0.5	0.5	0		0	0.972222	0.027778
	1	0	0		0	0.966667	0.033333
	0.428571	0.571429	0		0	0.833333	0.166667
	0.666667	0.333333	0		0	1	0
	0.833333	0.166667	0		0	0.724138	0.275862
	0.5	0.5	0		0	1	0
	0.833333	0.166667	0		0	1	0
	0	0.888889	0.111111		0	0.928571	0.071429
	0	1	0		0	1	0
	0	1	0		0	0.953488	0.046512
	0	1	0		0	0.9375	0.0625
	0	1	0		0	0.933333	0.066667
	0	1	0		0	0.933333	0.066667
	0	1	0		0	1	0
	0	1	0		0	1	0
	0	1	0		0	1	0
	0	1	0		0	1	0
	0	0.857143	0.142857		0	0.9	0.1
	0	0.833333	0.166667		0	1	0
	0	1	0		0.62963	0.37037	0
	0	0.8	0.2		0.666667	0.333333	0
	0	0.9	0.1		0.380952	0.619048	0
	0	1	0		0.8	0.2	0
	0	1	0		0.9	0.1	0
	0	0.875	0.125		0.733333	0.266667	0
	0	0.666667	0.333333		0.857143	0.142857	0
	0	1	0		0.615385	0.384615	0
	0	1	0		0.615385	0.384615	0
	0	1	0		0.692308	0.307692	0
	0	1	0		0.846154	0.153846	0
	0	1	0		0.6	0.4	0
	0	1	0		0.666667	0.333333	0
	0	1	0		0.583333	0.416667	0
	0	1	0		0.583333	0.416667	0
	0	0.857143	0.142857		0.428571	0.571429	0
	0	1	0		0.833333	0.166667	0
	0	0.9	0.1		0.916667	0.083333	0
	0	1	0		0.666667	0.333333	0
	0	1	0		0.727273	0.272727	0
	0	1	0		0.545455	0.454545	0
	0	1	0		0.166667	0.833333	0
	0	1	0		0.7	0.3	0
	0	1	0		0.5	0.5	0
	0	1	0		1	0	0
	0	1	0		0.636364	0.363636	0
	0	1	0		0.636364	0.363636	0
	0	1	0		0.8	0.2	0
	0	1	0		0.5	0.5	0
	0	1	0		0.7	0.3	0
	0	0.833333	0.166667		0.633333	0.366667	0
	0	1	0		0.615385	0.384615	0
	0	0.9	0.1		0	0.961538	0.038462
	0	1	0		0	1	0
	0	1	0		0	0.809524	0.190476
	0	1	0		0	1	0
	0	1	0		0	1	0
	0	1	0		0	0.966667	0.033333
	0	1	0		0	1	0
	0	0.833333	0.166667		0	0.916667	0.083333
	0	0.666667	0.333333		0	0.944444	0.055556
	0	0.666667	0.333333		0	0.973684	0.026316
	0	1	0		0	0.916667	0.083333
	0	1	0		0	0.9375	0.0625
	0	0.875	0.125		0	1	0
	0	0.888889	0.111111		0	1	0
	0	1	0		0	0.903226	0.096774
	0	1	0		0	1	0
	0	1	0		0	1	0
	0	1	0		0	0.909091	0.090909
	0	1	0		0	0.940476	0.059524
	0	0.857143	0.142857		0	0.967742	0.032258
	0	1	0		0	1	0
	0	1	0		0	1	0
	0	1	0		0	1	0
	0	1	0		0	1	0
	0	1	0		0	1	0
	0	0.833333	0.166667		0	1	0
	0	1	0		0	1	0
	0	1	0		0	1	0
	0	0.714286	0.285714		0	0.961538	0.038462
	0	1	0		0	0.947368	0.052632
	0	0.888889	0.111111		0	1	0
	0	1	0		0	1	0
	0	0.875	0.125		0	1	0
	0.9	0.1	0		0	0.962025	0.037975
	0.8	0.2	0		0	0.977273	0.022727
	0.555556	0.444444	0		0	1	0
	0.888889	0.111111	0		0	1	0
	0.6	0.4	0		0	0.9	0.1
	0.888889	0.111111	0		0	0.833333	0.166667
	0.375	0.625	0		0	0.958333	0.041667
	0.25	0.75	0		0	0.947368	0.052632
	0.5	0.5	0		0	0.944444	0.055556
	0.142857	0.857143	0		0	0.806452	0.193548
	0.714286	0.285714	0		0	1	0
	0.75	0.25	0		0	0.857143	0.142857
	0.375	0.625	0		0	0.857143	0.142857
	0.428571	0.571429	0		0	0.9	0.1
	1	0	0		0	0.8	0.2
	0.285714	0.714286	0		0.5	0.5	0
	0.571429	0.428571	0		0.703704	0.296296	0
	0.285714	0.714286	0		0.5	0.5	0
	0	1	0		0.238095	0.761905	0
	0.571429	0.428571	0		0.521739	0.478261	0
	0.714286	0.285714	0		0.7	0.3	0
	1	0	0		0.588235	0.411765	0
	0.5	0.5	0		0.789474	0.210526	0
	0.166667	0.833333	0		0.533333	0.466667	0
	0.428571	0.571429	0		0.307692	0.692308	0
	0.5	0.5	0		0.5	0.5	0
	0.666667	0.333333	0		0.615385	0.384615	0
	0.857143	0.142857	0		0.615385	0.384615	0
	0.142857	0.857143	0		0.583333	0.416667	0
	0.166667	0.833333	0		0.545455	0.454545	0
	1	0	0		0.25	0.75	0
	0.333333	0.666667	0		0.6	0.4	0
	0	1	0		0.4	0.6	0
	0	1	0		0.5	0.5	0
	0	0.857143	0.142857		0.666667	0.333333	0
	0	1	0		0.466667	0.533333	0
	0	0.571429	0.428571		0	1	0
	0	0.666667	0.333333		0	1	0
	0	0.9	0.1		0	0.9	0.1
	0	1	0		0	0.981481	0.018519
	0	0.875	0.125		0	1	0
	0	1	0		0	0.933333	0.066667
	0	0.833333	0.166667		0	1	0
	0	1	0		0	1	0
	0	1	0		0	0.886364	0.113636
	0	0.888889	0.111111		0	1	0
	0	0.888889	0.111111		0	0.9375	0.0625
	0	1	0		0	1	0
	0	0.875	0.125		0	1	0
	0	1	0		0	1	0
	0	0.857143	0.142857		0	1	0
	0	1	0		0	0	1
	0	0.875	0.125		0	1	0
	0	1	0		0	0.985075	0.014925
	0	1	0		0	0.983871	0.016129
	0	1	0		0	1	0
	0	1	0		0	0.909091	0.090909
	0	1	0		0	1	0
	0	0.9	0.1		0	1	0
	0	0.9	0.1		0	0.9375	0.0625
	0	1	0		0	1	0
	0	0.714286	0.285714		0	0.972222	0.027778
	0	1	0		0	0.8	0.2
	0	1	0		0	1	0
	0	1	0		0	1	0
	0	1	0		0	1	0
	0	0.833333	0.166667		0	0.961538	0.038462
	0	0	1		0	0.9375	0.0625
	0	1	0		0	1	0
	0	1	0		0	1	0
	0	1	0		0.860465	0.139535	0
	0	0.714286	0.285714		1	0	0
	0	1	0		0.444444	0.555556	0
	0	0.75	0.25		0.72	0.28	0
	0	1	0		0.631579	0.368421	0
	0	1	0		0.842105	0.157895	0
	0	1	0		0.5	0.5	0
	0	1	0		0.6875	0.3125	0
	0	1	0		0.5625	0.4375	0
	0	0.714286	0.285714		0.25	0.75	0
	0	1	0		0.416667	0.583333	0
	0	0.666667	0.333333		0.75	0.25	0
	0	1	0		0.727273	0.272727	0
	0	1	0		0.636364	0.363636	0
	0	1	0		0.727273	0.272727	0
	0	0.888889	0.111111		0.545455	0.454545	0
	0	1	0		0.75	0.25	0
	0	1	0		1	0	0
	0	1	0		0	0.988636	0.011364
	0	1	0		0	0.980769	0.019231
	0	1	0		0	0.971429	0.028571
	0	1	0		0	0.96875	0.03125
	0	0.9	0.1		0	1	0
	0	1	0		0	1	0
	0	1	0		0	1	0
	0	0.857143	0.142857		0	1	0
	0	1	0		0	1	0
	0	1	0		0	0.904762	0.095238
	0	1	0		0	1	0
	0	0.833333	0.166667		0	1	0
	0	0.833333	0.166667		0	1	0
	0	0.714286	0.285714		0	1	0
	0	0.666667	0.333333		0	1	0
	0	0.166667	0.833333		0	1	0
	0	1	0		0	0.941176	0.058824
	0	1	0		0	1	0
	0	1	0		0	0.968254	0.031746
	0.7	0.3	0		0	0.967213	0.032787
	0.5	0.5	0		0	1	0
	1	0	0		0	0.909091	0.090909
	0.8	0.2	0		0	0	1
	0.444444	0.555556	0		0	0.972973	0.027027
	0.444444	0.555556	0		0	1	0
	0.666667	0.333333	0		0	0.9375	0.0625
	0.5	0.5	0		0	1	0
	1	0	0		0	1	0
	1	0	0		0	0.923077	0.076923
	0.7	0.3	0		0	1	0
	0.888889	0.111111	0		0	1	0
	0.555556	0.444444	0		0	1	0
	0.5	0.5	0		0	1	0
	0.75	0.25	0		0	0.961538	0.038462
	1	0	0		0	1	0
	0.875	0.125	0		0	1	0
	0.888889	0.111111	0		0	1	0
	1	0	0		0	1	0
	0.555556	0.444444	0		0	0.979592	0.020408
	0.571429	0.428571	0		0	1	0
	0.571429	0.428571	0		0	0.958333	0.041667
	0.714286	0.285714	0		0	1	0
	0.375	0.625	0		0	0.923077	0.076923
	1	0	0		0	1	0
	1	0	0		0	0.833333	0.166667
	1	0	0		0	1	0
	1	0	0		0	1	0
	1	0	0		0	1	0
	1	0	0		0	1	0
	1	0	0		0	1	0
	1	0	0		0	1	0
	0.857143	0.142857	0		0	1	0
	0.428571	0.571429	0		0.466667	0.533333	0
	0.5	0.5	0		0.8	0.2	0
	0.666667	0.333333	0		0.724138	0.275862	0
	0.666667	0.333333	0		0.769231	0.230769	0
	1	0	0		0.217391	0.782609	0
	1	0	0		0.238095	0.761905	0
	1	0	0		0.578947	0.421053	0
	0.142857	0.857143	0		0.578947	0.421053	0
	0.833333	0.166667	0		0.647059	0.352941	0
	0.857143	0.142857	0		0.5625	0.4375	0
	0.666667	0.333333	0		0.882353	0.117647	0
	1	0	0		0.6875	0.3125	0
	0.111111	0.888889	0		0.133333	0.866667	0
	1	0	0		0.923077	0.076923	0
	1	0	0		0.076923	0.923077	0
	0.625	0.375	0		0.153846	0.846154	0
	0.714286	0.285714	0		0.416667	0.583333	0
	0.857143	0.142857	0		0.785714	0.214286	0
	0.857143	0.142857	0		0.461538	0.538462	0
	1	0	0		0.083333	0.916667	0
	1	0	0		0.833333	0.166667	0
	0.666667	0.333333	0		0	1	0
	0	1	0		0	1	0
	0	1	0		0.4	0.6	0
	0	1	0		0.1	0.9	0
	0	0.857143	0.142857		0.396825	0.603175	0
	0	0.833333	0.166667		0	1	0
	0	1	0		0	0.846154	0.153846
	0	0.75	0.25		0	0.923077	0.076923
	0	0.875	0.125		0	1	0
	0	1	0		0	0.947368	0.052632
	0	1	0		0	0.954545	0.045455
	0	0.888889	0.111111		0	0.914894	0.085106
	0	1	0		0	1	0
	0	1	0		0	1	0
	0	1	0		0	1	0
	0	0.875	0.125		0	0.909091	0.090909
	0	1	0		0	0.909091	0.090909
	0	1	0		0	0.969697	0.030303
	0	1	0		0	0.9375	0.0625
	0	0.857143	0.142857		0	1	0
	0	1	0		0	1	0
	0	0.875	0.125		0	0.846154	0.153846
	0	0.875	0.125		0	1	0
	0	1	0		0	1	0
	0	1	0		0	0.953488	0.046512
	0	0.857143	0.142857		0	0.972973	0.027027
	0	0.833333	0.166667		0	0.961538	0.038462
	0	0.833333	0.166667		0	1	0
	0	0	1		0	0.956522	0.043478
	0	0	1		0	1	0
	0	1	0		0	1	0
	0	1	0		0	0.977273	0.022727
	0	1	0		0	1	0
	0	0.857143	0.142857		0	1	0
	0	1	0		0	1	0
	0	0.833333	0.166667		0	0.833333	0.166667
	0	1	0		0	1	0
	0	1	0		0.363636	0.636364	0
	0	1	0		0.733333	0.266667	0
	0	1	0		0.6	0.4	0
	0	1	0		0.3125	0.6875	0
	0	1	0		0.076923	0.923077	0
	0	0.857143	0.142857		0.5	0.5	0
	0	1	0		0.461538	0.538462	0
	0	1	0		0.307692	0.692308	0
	0	1	0		0.833333	0.166667	0
	0	0.833333	0.166667		0.166667	0.833333	0
	0	0.888889	0.111111		1	0	0
	0	1	0		0.545455	0.454545	0
	0	1	0		0.133333	0.866667	0
	0	1	0		0.107143	0.892857	0
	0	1	0		0.363636	0.636364	0
	0	1	0		0.375	0.625	0
	0	0.833333	0.166667		0.4	0.6	0
	0	1	0		0	0.931818	0.068182
	0	1	0		0	1	0
	0	1	0		0	1	0
	0	1	0		0	1	0
	0	1	0		0	0.923077	0.076923
	0	1	0		0	1	0
	0	0.833333	0.166667		0	0.9	0.1
	0	1	0		0	0.928571	0.071429
	0	0.833333	0.166667		0	0.923077	0.076923
	0	1	0		0	1	0
	0	1	0		0	0.923077	0.076923
	0	0.9	0.1		0	0.909091	0.090909
	0	1	0		0	1	0
	0	0.166667	0.833333		0	0.916667	0.083333
	0	1	0		0	0.9375	0.0625
	0	1	0		0	0.9	0.1
	0	0.571429	0.428571		0	0.972973	0.027027
	0	0.857143	0.142857		0	0.947368	0.052632
	0	1	0		0	0.785714	0.214286
	0	0.9	0.1		0	0.9	0.1
	0	0.8	0.2		0	0.96	0.04
	0	0.833333	0.166667		0	1	0
	0.6	0.4	0		0	0.9	0.1
	0.4	0.6	0		0	0.931034	0.068966
	0.555556	0.444444	0		0	0.952381	0.047619
	0.777778	0.222222	0		0	0.941176	0.058824
	0.555556	0.444444	0		0	0.969231	0.030769
	1	0	0		0	1	0
	0.875	0.125	0		0	1	0
	0.666667	0.333333	0		0	1	0
	0.375	0.625	0		0	1	0
	0.625	0.375	0		0	1	0
	0.714286	0.285714	0		0.642857	0.357143	0
	0.5	0.5	0		0.615385	0.384615	0
	0	1	0		0.736842	0.263158	0
	0.428571	0.571429	0		0.4	0.6	0
	0.875	0.125	0		0.555556	0.444444	0
	0.428571	0.571429	0		0.076923	0.923077	0
	0.857143	0.142857	0		0.083333	0.916667	0
	0.375	0.625	0		0.833333	0.166667	0
	0.428571	0.571429	0		0.727273	0.272727	0
	0.428571	0.571429	0		0.090909	0.909091	0
	0.571429	0.428571	0		0	1	0
	0.333333	0.666667	0		0.272727	0.727273	0
	0.571429	0.428571	0		0.8	0.2	0
	0	1	0		0.727273	0.272727	0
	0.833333	0.166667	0		0.8	0.2	0
	0	1	0		0.416667	0.583333	0
	0	1	0		0	1	0
	0.666667	0.333333	0		0	0.4	0.6
	0.5	0.5	0		0	0.2	0.8
	0.125	0.875	0		0	0	1
	0.125	0.875	0
	0.571429	0.428571	0
	0.428571	0.571429	0
	0	1	0
	0.5	0.5	0
	0	1	0
	0	0.9	0.1
	0	1	0
	0	1	0
	0	1	0
	0	1	0
	0	1	0
	0	1	0
	0	0.833333	0.166667
	0	1	0
	0	0.666667	0.333333
	0	1	0
	0	1	0
	0	1	0
	0	1	0
	0	0.75	0.25
	0	1	0
	0	1	0
	0	0.833333	0.166667
	0	1	0
	0	1	0
	0	1	0
	0	1	0
	0	0.833333	0.166667
	0	0	1
	0	0	1
	0	0	1
	0	0.875	0.125
	0	0.857143	0.142857
	0	1	0
	0	1	0
	0	0.833333	0.166667
	0	1	0
	0	1	0
	0	1	0
	0	1	0
	0	0.714286	0.285714
	0	0.888889	0.111111
	0	1	0
	0	1	0
	0	1	0
	0	1	0
	0	1	0
	0	1	0
	0	1	0
	0	0.888889	0.111111
	0	0.875	0.125
	0	1	0
	0	0.8	0.2
	0	1	0
	0	1	0
	0	1	0
	0	1	0
	0	1	0
	0	1	0
	0	1	0
	0	1	0
	0	1	0
	0	1	0
	0	1	0
	0	1	0
	0	1	0
	0	1	0
	0	1	0
	0	1	0
	0	1	0
	1	0	0
	0.571429	0.428571	0
	0.428571	0.571429	0
	0.714286	0.285714	0
	0.857143	0.142857	0
	0.714286	0.285714	0
	1	0	0
	0	1	0
	0	1	0
	0.666667	0.333333	0
	1	0	0
	0.833333	0.166667	0
	0.666667	0.333333	0
	0.833333	0.166667	0
	0	1	0
	0.142857	0.857143	0
	0.5	0.5	0
	0.428571	0.571429	0
	1	0	0
	0.5	0.5	0
	0	1	0
	0.142857	0.857143	0
	0.333333	0.666667	0
	0	1	0
	0	0.714286	0.285714
	0	0.571429	0.428571
	0	1	0
	0	1	0
	0	1	0
	0	0.625	0.375
	0	0.833333	0.166667
	0	1	0
	0	1	0
	0	1	0
	0	1	0
	0	1	0
	0	1	0
	0	1	0
	0	1	0
	0	1	0
	0	1	0
	0	1	0
	0	0.833333	0.166667
	0	1	0
	0	1	0
	0	1	0
	0	1	0
	0	1	0
	0	1	0
	0	0	1
	0	0	1
	0	0	1
	0	0	1
	0	1	0
	0	0.888889	0.111111
	0	1	0
	0	1	0
	0	1	0
	0	0.888889	0.111111
	0	1	0
	0	0.714286	0.285714
	0	1	0
	0	1	0
	0	1	0
	0	1	0
	0	1	0
	0	1	0
	0	1	0
	0	1	0
	0	1	0
	0	1	0
	0	1	0
	0	1	0
	0	1	0
	0	1	0
	0	1	0
	0	1	0
	0	1	0
	0	0.857143	0.142857
	0	0.888889	0.111111
	0	1	0
	0	1	0
	0	0.857143	0.142857
	0	0.857143	0.142857
	0	0.75	0.25
	0	1	0
	0	0.857143	0.142857
	0	1	0
	0	1	0
	0	1	0
	0	1	0
	0	1	0
	0	1	0
	0	1	0
	0	1	0
	0	1	0
	0	1	0
	0	1	0
	0	1	0
	0	1	0
	0	1	0
	0	1	0
	0	1	0
	0	1	0
	0	1	0
	0.4	0.6	0
	0.1	0.9	0
	0.222222	0.777778	0
	1	0	0
	0	1	0
	0.333333	0.666667	0
	0.222222	0.777778	0
	0.222222	0.777778	0
	0	1	0
	0.444444	0.555556	0
	0	1	0
	0.75	0.25	0
	0.625	0.375	0
	0.625	0.375	0
	1	0	0
	1	0	0
	0.714286	0.285714	0
	0.142857	0.857143	0
	0.428571	0.571429	0
	0.285714	0.714286	0
	0.125	0.875	0
	0.285714	0.714286	0
	0.714286	0.285714	0
	0.285714	0.714286	0
	1	0	0
	1	0	0
	1	0	0
	0.571429	0.428571	0
	0.571429	0.428571	0
	0.666667	0.333333	0
	0.857143	0.142857	0
	0	1	0
	0.833333	0.166667	0
	1	0	0
	0.833333	0.166667	0
	0.5	0.5	0
	0.666667	0.333333	0
	0.5	0.5	0
	0.333333	0.666667	0
	0.166667	0.833333	0
	0.333333	0.666667	0
	0.75	0.25	0
	0	1	0
	0	1	0
	0	1	0
	1	0	0
	1	0	0
	1	0	0
	0.333333	0.666667	0
	0	0.714286	0.285714
	0	1	0
	0	0.833333	0.166667
	0	0	1
	0	0.857143	0.142857
	0	1	0
	0	1	0
	0	0.714286	0.285714
	0	0.625	0.375
	0	1	0
	0	1	0
	0	1	0
	0	1	0
	0	1	0
	0	0.857143	0.142857
	0	0.857143	0.142857
	0	0.833333	0.166667
	0	1	0
	0	1	0
	0	1	0
	0	1	0
	0	0.833333	0.166667
	0	1	0
	0	1	0
	0	1	0
	0	0.888889	0.111111
	0	0.875	0.125
	0	1	0
	0	0.833333	0.166667
	0	0.857143	0.142857
	0	0.833333	0.166667
	0	1	0
	0	1	0
	0	1	0
	0	0.833333	0.166667
	0	1	0
	0	1	0
	0	1	0
	0	0.888889	0.111111
	0	0.875	0.125
	0	1	0
	0	1	0
	0	0.857143	0.142857
	0	0.857143	0.142857
	0	1	0
	0	1	0
	0	0.857143	0.142857
	0	1	0
	0	1	0
	0	0.5	0.5
	0	0.857143	0.142857
	0	1	0
	0.888889	0.111111	0
	0.555556	0.444444	0
	0.555556	0.444444	0
	0.375	0.625	0
	0.777778	0.222222	0
	0.875	0.125	0
	0.857143	0.142857	0
	0.285714	0.714286	0
	0	1	0
	1	0	0
	1	0	0
	0	1	0
	0.333333	0.666667	0
	0.333333	0.666667	0
	0.5	0.5	0
	0.333333	0.666667	0
	0.5	0.5	0
	0	1	0
	0.333333	0.666667	0
	0.5	0.5	0
	0	1	0
	0	1	0
	1	0	0
	0.714286	0.285714	0
	0.166667	0.833333	0
	0.5	0.5	0
	0	0	1
	0	0	1
	0	0	1
	0	0.9	0.1
	0	0.888889	0.111111
	0	1	0
	0	1	0
	0	0.75	0.25
	0	0.857143	0.142857
	0	1	0
	0	1	0
	0	1	0
	0	1	0
	0	1	0
	0	0.888889	0.111111
	0	1	0
	0	1	0
	0	1	0
	0	1	0
	0	1	0
	0	1	0
	0	1	0
	0	1	0
	0	1	0
	0	1	0
	0	0.875	0.125
	0	1	0
	0	1	0
	0	0.714286	0.285714
	0	1	0
	0	0.777778	0.222222
	0	1	0
	0	1	0
	0	0.9	0.1
	0	1	0
	0	0.857143	0.142857
	0	0.9	0.1
	0	1	0
	0	1	0
	0	1	0
	0	1	0
	0	1	0
	0	1	0
	0	1	0
	0	0.9	0.1
	0	1	0
	0	1	0
	0	1	0
	0	1	0
	0	1	0
	0	1	0
	0	1	0
	0	1	0
	0	1	0
	0	1	0
	0	1	0
	0	1	0
	0	1	0
	0	1	0
	0	0.857143	0.142857
	0	1	0
	0	1	0
	0	1	0
	0	1	0
	0.8	0.2	0
	0.8	0.2	0
	0.25	0.75	0
	0.375	0.625	0
	0	1	0
	0.5	0.5	0
	0.571429	0.428571	0
	0.142857	0.857143	0
	0.428571	0.571429	0
	0.875	0.125	0
	0.428571	0.571429	0
	0.5	0.5	0
	0.428571	0.571429	0
	0.5	0.5	0
	0.571429	0.428571	0
	0.333333	0.666667	0
	0.666667	0.333333	0
	0.666667	0.333333	0
	0	1	0
	0.571429	0.428571	0
	0.666667	0.333333	0
	0.833333	0.166667	0
	0.571429	0.428571	0
	0	1	0
	0.5	0.5	0
	0.666667	0.333333	0
	0	1	0
	0.333333	0.666667	0
	0.375	0.625	0
	0	1	0
	1	0	0
	0.285714	0.714286	0
	0.625	0.375	0
	0.142857	0.857143	0
	0	1	0
	0.333333	0.666667	0
	0	1	0
	0	0	1
	0	0	1
	0	0.4	0.6
	0	1	0
	0	0	1
	0	1	0
	0	1	0
	0	0.166667	0.833333

## Sheet: Fig2d
I	II	III	IV	V		I-III	IV-V	FT	TT
6.8783	8.831	3.60045	1.13053	0.327129		6.8783	1.13053	8.79337e-24	3.76964e-119
3.90668	6.4022	0.096908	0.219384	0.346552		3.90668	0.219384
6.89457	5.76814	1.67714	5.32231	0.144029		6.89457	5.32231
1.13963	0.697443	6.10818	3.02796	1.02947		1.13963	3.02796
2.18133	2.91785	4.55864	3.94566	3.14967		2.18133	3.94566
1.6779	5.06389	0.810625	0.076643	0.095407		1.6779	0.076643
8.54941	4.18379	2.99925	1.18796	0.083004		8.54941	1.18796
0.29553	6.2208	3.41667	1.01422	0.287433		0.29553	1.01422
3.3031	0.221941	6.07173	1.70382	0.668732		3.3031	1.70382
3.87082	3.5398	0.134308	3.94558	4.73849		3.87082	3.94558
3.63745	0.817174	0.825476	2.91794	4.02865		3.63745	2.91794
0.301288	0.533978	5.25296	0.09715	1.08938		0.301288	0.09715
5.00755	3.10731	5.09392	6.18721	3.43275		5.00755	6.18721
3.38982	1.50319	2.17413	4.72085	0.428942		3.38982	4.72085
2.55466	3.20209	0.290942	1.77254	5.96947		2.55466	1.77254
3.39179	2.10563	0.861111	2.74216	0.430786		3.39179	2.74216
4.34254	4.71063	0.362627	0.14637	0.370942		4.34254	0.14637
1.97991	1.44658	3.08533	1.48548	0.27087		1.97991	1.48548
5.66987	1.63235	3.2777	1.33821	2.78151		5.66987	1.33821
1.61775	4.55356	0.114743	0.070799	0.841908		1.61775	0.070799
0.838961	0.069657	4.93591	1.05003	1.60554		0.838961	1.05003
0.806706	0.997951	6.43493	0.134301	0.220284		0.806706	0.134301
4.77548	1.30104	0.16754	0.473046	4.6842		4.77548	0.473046
4.78648	0.815878	2.67653	0.209314	0.113303		4.78648	0.209314
3.9711	2.13163	3.39826	0.100154	0.287465		3.9711	0.100154
3.91429	3.41214	3.09724	0.708018	0.001005		3.91429	0.708018
2.09977	0.684695	0.222244	0.485191	0.848083		2.09977	0.485191
0.6054	1.78191	4.71938	0.57937	2.2084		0.6054	0.57937
5.30908	1.49223	0.009433	1.71152	5.51895		5.30908	1.71152
0.032458	4.77089	1.80065	0.688608	2.24293		0.032458	0.688608
3.40653	3.47487	0.258705	0.029189	1.81722		3.40653	0.029189
1.95529	3.36355	0.364297	0.110935	0.187233		1.95529	0.110935
3.67398	3.18675	5.91957	0.526073	2.04943		3.67398	0.526073
2.90765	3.31671	0.379068	0.307939	0.967708		2.90765	0.307939
2.57803	0.886095	1.63067	0.125375	1.70584		2.57803	0.125375
1.53892	3.73543	4.60161	0.200302	3.36864		1.53892	0.200302
3.98455	0.287893	2.87692	0.183678	0.400842		3.98455	0.183678
4.10065	5.98587	0.753181	1.86915	2.12881		4.10065	1.86915
3.5897	1.03641	5.46451	0.157909	0.156694		3.5897	0.157909
6.37636	2.57444	2.0721	0.105827	0.109882		6.37636	0.105827
2.16061	4.66536	0.147374	1.60566	0.121526		2.16061	1.60566
5.22196	0.332098	3.49831	0.833082	3.23142		5.22196	0.833082
4.44004	0.398506	0.400882	3.24785	0.192914		4.44004	3.24785
4.31245	2.74286	2.48761	0.057228	0.129778		4.31245	0.057228
2.25665	5.2332	2.16764	0.297937	0.316196		2.25665	0.297937
3.90696	6.29271	3.63724	0.095926	0.334374		3.90696	0.095926
2.01062	0.782761	4.41454	3.00849	0.534697		2.01062	3.00849
5.61596	0.237576	1.06689	0.140001	0.607332		5.61596	0.140001
2.37307	6.76221	5.45713	0.093003	0.651273		2.37307	0.093003
0.710733	0.154638	1.80894	4.96446	3.5355		0.710733	4.96446
4.33917	6.36205	0.573976	0.680273	2.76243		4.33917	0.680273
0.228598	3.573	0.644621	0.087334	0.303803		0.228598	0.087334
1.33136	3.84006	4.96393	3.4162	2.64835		1.33136	3.4162
0.404547	4.72733	3.01697	3.65886	0.292427		0.404547	3.65886
0.970575	0.42784	2.43043	2.47397	0.081967		0.970575	2.47397
1.75188	5.19957	1.90971	1.12713	0.81953		1.75188	1.12713
0.940829	7.92436	0.74688	0.207883	2.24178		0.940829	0.207883
3.78902	0.201526	3.39877	0.167587	4.62368		3.78902	0.167587
3.30895	4.98336	5.4376	1.91176	1.25577		3.30895	1.91176
1.25593	3.97451	3.74077	2.83125	0.109358		1.25593	2.83125
5.20241	6.55105	2.53546	0.502854	0.637889		5.20241	0.502854
3.04256	0.177114	0.316336	0.085501	6.0449		3.04256	0.085501
0.550303	1.34862	4.58072	2.48194	0.09285		0.550303	2.48194
0.455155	0.000965	4.54998	2.70248	0.142896		0.455155	2.70248
3.36855	4.03916	1.32537	4.92839	6.16167		3.36855	4.92839
7.13817	0.164894	3.74948	2.15305	2.66077		7.13817	2.15305
1.38231	0.967867	6.1644	0.096404	0.401949		1.38231	0.096404
0.058703	0.272782	2.7224	0.067166	1.56904		0.058703	0.067166
0.544264	0.759994	0.830809	6.32547	5.1782		0.544264	6.32547
3.57477	2.91268	0.755174	0.920007	0.581401		3.57477	0.920007
3.13629	3.86482	0.747538	1.14689	4.14441		3.13629	1.14689
0.360932	1.43224	1.3197	0.339235	0.188447		0.360932	0.339235
3.49799	5.85283	3.58607	1.67087	0.114494		3.49799	1.67087
2.41606	0.700901	1.3521	2.45401	0.041223		2.41606	2.45401
5.57026	3.50956	0.777406	0.55219	1.17411		5.57026	0.55219
1.96974	2.55839	4.95853	0.933548	1.07029		1.96974	0.933548
3.54067	4.0033	1.38724	0.23874	0.165961		3.54067	0.23874
4.70764	0.182959	0.287931	1.8935	0.953548		4.70764	1.8935
2.99599	0.125516	1.21116	1.09837	7.69362		2.99599	1.09837
0.220048	2.25828	2.97907	1.07163	0.979455		0.220048	1.07163
0.252333	3.93958	2.31737	1.71176	0.533483		0.252333	1.71176
0.738565	7.63788	2.9382	2.01387	0.054557		0.738565	2.01387
3.488	0.557579	6.57446	0.723259	1.49645		3.488	0.723259
7.11751	6.87374	0.233437	0.377939	0.153185		7.11751	0.377939
2.60544	0.146194	0.526017	1.59895	0.02204		2.60544	1.59895
3.98591	3.54905	2.43112	2.6113	4.30765		3.98591	2.6113
0.025078	1.20468	3.90808	0.741156	2.04171		0.025078	0.741156
1.08194	0.13605	2.9377	3.76193	1.54277		1.08194	3.76193
1.81294	1.11234	4.27404	0.339949	3.18621		1.81294	0.339949
1.70828	0.801335	2.54117	0.436099	2.08818		1.70828	0.436099
3.89136	8.48788	2.80516	2.08435	0.813932		3.89136	2.08435
6.79581	0.791245	7.42549	0.357775	3.26359		6.79581	0.357775
4.21076	6.17885	1.62411	0.334193	1.50815		4.21076	0.334193
4.83729	4.24116	5.32464	1.94389	2.74501		4.83729	1.94389
4.2835	2.99265	6.32102	3.46706	2.96261		4.2835	3.46706
1.61869	2.0906	2.19338	5.02928	0.339985		1.61869	5.02928
0.18727	3.13021	0.794374	0.090465	0.774959		0.18727	0.090465
0.095145	1.89897	2.39089	0.199098	0.043276		0.095145	0.199098
1.1417	4.42236	2.68002	0.309823	3.19862		1.1417	0.309823
7.60459	0.262484	0.059023	0.145089	0.605172		7.60459	0.145089
0.96782	4.46432	0.255325	1.16835	0.431994		0.96782	1.16835
6.11831	6.54067	3.16766	2.61949	1.37748		6.11831	2.61949
0.392319	0.900183	4.41353	0.814949	2.23018		0.392319	0.814949
0.454002	3.42123	5.19735	4.29829	5.53475		0.454002	4.29829
5.89457	1.94994	1.46769	3.45087	0.822082		5.89457	3.45087
2.65144	3.20015	2.77716	0.300007	2.45695		2.65144	0.300007
3.33839	5.27623	4.0095	0.823427	0.06427		3.33839	0.823427
2.99617	5.64919	1.47825	0.607015	0.564964		2.99617	0.607015
5.96369	6.34508	4.67495	0.052714	1.18007		5.96369	0.052714
6.31781	0.17981	6.3649	1.31885	0.29818		6.31781	1.31885
4.50817	1.39325	0.049646	3.51504	2.91948		4.50817	3.51504
0.350107	5.1168	0.77623	5.10326	1.97632		0.350107	5.10326
4.24376	4.45721	6.25746	1.79795	0.019175		4.24376	1.79795
0.628624	0.552863	4.09069	3.67663	2.20636		0.628624	3.67663
0.195181	1.13893	4.30135	1.98807	4.21564		0.195181	1.98807
4.01154	0.042632	5.9851	0.186556	0.960929		4.01154	0.186556
7.27939	1.28451	7.05925	0.74804	0.877998		7.27939	0.74804
2.68261	1.26734	0.113414	0.727106	0.731054		2.68261	0.727106
2.34321	3.27082	0.635523	0.311083	0.182589		2.34321	0.311083
0.190411	3.93579	1.08149	0.268342	1.30212		0.190411	0.268342
0.026534	4.00092	0.35899	0.3634	0.291655		0.026534	0.3634
3.49493	1.81741	0.568601	1.58491	0.827702		3.49493	1.58491
2.01063	4.34026	0.932481	0.990635	1.82461		2.01063	0.990635
0.745159	2.01353	3.15407	3.00708	1.44672		0.745159	3.00708
2.33131	2.95688	0.964901	0.328197	0.278898		2.33131	0.328197
4.00825	0.078914	1.38091	2.43805	4.07212		4.00825	2.43805
0.352908	1.80976	3.11777	0.408146	0.45712		0.352908	0.408146
2.91733	2.23742	1.53984	1.96971	0.89254		2.91733	1.96971
3.77306	4.39792	1.26803	0.106584	8.86379		3.77306	0.106584
8.3703	2.84135	0.669986	5.82668	0.693569		8.3703	5.82668
2.83568	2.90428	3.32016	0.222755	1.27993		2.83568	0.222755
3.04062	2.36643	1.63746	1.69101	0.296987		3.04062	1.69101
0.293428	3.1523	2.04156	1.49668	1.94023		0.293428	1.49668
1.67105	10.3288	0.902879	0.462363	1.37838		1.67105	0.462363
0.54035	2.87859	1.32584	3.81455	0.32551		0.54035	3.81455
7.76815	5.94485	0.25586	0.460789	2.94822		7.76815	0.460789
4.26777	0.0417	2.91276	1.32708	2.41818		4.26777	1.32708
1.15831	2.6193	1.31821	0.699803	8.23743		1.15831	0.699803
5.23273	1.2331	5.691	1.38835	0.43707		5.23273	1.38835
2.3649	0.370603	0.273856	0.342998	2.59432		2.3649	0.342998
4.6766	6.51792	4.02182	1.10274	1.42399		4.6766	1.10274
3.9162	0.067918	1.06846	0.172482	2.6794		3.9162	0.172482
3.81443	4.1438	1.51278	0.977402	1.42502		3.81443	0.977402
0.62175	0.696767	0.192233	0.47567	3.28097		0.62175	0.47567
5.77192	3.77436	0.239988	2.8757	0.412611		5.77192	2.8757
0.47465	1.99155	2.3749	1.51855	4.48277		0.47465	1.51855
2.70844	0.412394	3.2128	1.53254	2.78492		2.70844	1.53254
1.34802	4.95632	2.6797	2.6673	3.68764		1.34802	2.6673
2.51634	6.22826	0.248543	2.00039	0.484232		2.51634	2.00039
1.0084	3.23998	2.75072	2.08396	1.8909		1.0084	2.08396
0.140263	4.44371	0.230271	3.59275	1.42378		0.140263	3.59275
1.56073	6.68933	0.979577	0.18211	1.81014		1.56073	0.18211
0.656539	5.28416	2.53005	5.95501	5.33341		0.656539	5.95501
6.15749	5.35705	0.395994	0.276385	1.30739		6.15749	0.276385
4.55852	0.380148	1.96345	5.37233	2.55162		4.55852	5.37233
0.45436	3.56924	4.5241	0.683686	3.46208		0.45436	0.683686
3.68574	2.84534	3.49992	3.80642	0.142051		3.68574	3.80642
3.66005	0.259338	3.193	1.28499	0.596126		3.66005	1.28499
4.13824	0.509282	0.226899	0.34615	0.678361		4.13824	0.34615
1.16275	1.86779	0.057728	0.219514	2.99871		1.16275	0.219514
7.11413	1.43249	4.64506	0.549808	5.19156		7.11413	0.549808
0.35952	0.462073	1.29709	0.371659	0.21452		0.35952	0.371659
0.065215	7.00496	3.64335	2.51757	0.19368		0.065215	2.51757
1.88121	5.20846	1.93895	2.21084	1.34603		1.88121	2.21084
3.15074	5.49051	1.10419	4.14097	1.65208		3.15074	4.14097
0.760114	0.072847	1.71416	0.151991	0.654879		0.760114	0.151991
2.29822	3.65344	0.076402	4.02288	0.209825		2.29822	4.02288
0.194443	1.1179	1.59411	3.42667	3.16852		0.194443	3.42667
6.18397	3.60808	6.88919	0.141816	0.243792		6.18397	0.141816
5.9407	3.44085	11.5345	0.432174	1.49941		5.9407	0.432174
1.1819	3.93043	0.070413	2.90353	0.252493		1.1819	2.90353
0.328205	3.72488	4.52463	1.83414	0.915524		0.328205	1.83414
2.88144	0.404314	0.176035	0.048482	0.719872		2.88144	0.048482
5.38803	4.28209	2.8323	0.277192	0.548006		5.38803	0.277192
5.37324	3.81365	2.80914	1.10674	1.82881		5.37324	1.10674
0.245391	0.701369	0.290511	0.292565	0.824987		0.245391	0.292565
0.249744	6.04326	0.676818	2.54654	0.32105		0.249744	2.54654
5.31745	2.47459	0.175049	3.03846	0.537805		5.31745	3.03846
0.058871	1.92732	1.64019	1.46097	0.839301		0.058871	1.46097
0.521253	2.90596	2.7209	0.089857	0.017794		0.521253	0.089857
4.58178	1.59093	2.61777	0.466011	0.773184		4.58178	0.466011
3.39244	0.887386	2.97401	0.076737	0.086898		3.39244	0.076737
1.64222	4.49901	0.391295	0.800625	0.059276		1.64222	0.800625
4.72155	3.25289	3.32866	0.296659	5.47616		4.72155	0.296659
2.2031	5.25953	0.994509	0.345307	0.414677		2.2031	0.345307
0.54668	4.34407	0.79199	1.05877	3.61627		0.54668	1.05877
0.793019	3.45331	1.8442	1.27846	0.118822		0.793019	1.27846
0.709195	1.36007	2.53156	2.56403	0.848472		0.709195	2.56403
0.397594	1.80059	3.41006	1.08062	0.581885		0.397594	1.08062
5.95313	2.91554		0.722187	4.77928		5.95313	0.722187
3.59818	0.59468		3.39392	0.349021		3.59818	3.39392
2.42475	6.06632		0.245813	0.665952		2.42475	0.245813
0.49153	3.93258		3.94513	0.306827		0.49153	3.94513
0.102893	2.31394		1.36118	0.145723		0.102893	1.36118
2.67382	4.83132		0.847639	1.8079		2.67382	0.847639
1.96973	3.00469		1.56042	1.75017		1.96973	1.56042
2.70618	3.20102		4.67036	2.69831		2.70618	4.67036
2.49572	0.183702		0.063554	0.245597		2.49572	0.063554
3.85926	2.44208		0.024284	3.28718		3.85926	0.024284
4.97438	6.28185		0.981385	2.58679		4.97438	0.981385
2.78566	4.15248		0.548773	0.290371		2.78566	0.548773
3.05262	3.3379		0.588779	6.43305		3.05262	0.588779
4.7511	0.538462		0.119944	5.36377		4.7511	0.119944
5.48635	4.16135		5.90147	2.03396		5.48635	5.90147
3.58372	2.74966		4.33465	0.095926		3.58372	4.33465
7.71515	5.83355		0.675391	1.48376		7.71515	0.675391
7.71195	0.283928		4.98056	2.44991		7.71195	4.98056
2.66369	3.65418		0.814822	0.196374		2.66369	0.814822
3.239	1.21006		1.48283	3.53249		3.239	1.48283
0.904291	0.378283		1.44935	0.115995		0.904291	1.44935
0.046255	3.09205		0.943744	3.67441		0.046255	0.943744
3.63775	0.597022		3.60739	1.68657		3.63775	3.60739
0.274241	0.807043		0.100629	1.22591		0.274241	0.100629
5.0483	2.03311		1.59647	3.37767		5.0483	1.59647
6.32118	0.158748		0.498217	0.446734		6.32118	0.498217
0.388366	4.84368		1.384	1.63948		0.388366	1.384
0.931086	0.158845		0.43278	4.3732		0.931086	0.43278
1.08729	2.00891		3.49854	1.75791		1.08729	3.49854
0.918005	8.02216		0.713459	3.2521		0.918005	0.713459
4.66802	7.73677		0.159021	2.71046		4.66802	0.159021
3.9797	3		0.642784	3.24616		3.9797	0.642784
4.0178	4.99274		0.644663	0.40329		4.0178	0.644663
2.4052	1.35461		0.258861	0.93664		2.4052	0.258861
5.07653	0.145237		4.47365	0.231501		5.07653	4.47365
0.358159	6.16481		2.25428	1.85244		0.358159	2.25428
0.733686	5.9103		0.364904	0.949253		0.733686	0.364904
5.01818	2.8964		1.0237	0.910986		5.01818	1.0237
2.12698	4.69906		0.499189	2.19486		2.12698	0.499189
2.97534	4.20588		5.70986	0.241383		2.97534	5.70986
0.089033	3.30821		1.51439	3.61484		0.089033	1.51439
3.33001	3.74497		2.7238	2.18266		3.33001	2.7238
2.72934	2.12539		0.372203	0.328888		2.72934	0.372203
0.494495	2.77028		0.305437	1.2343		0.494495	0.305437
4.54434	0.961089		2.57631	3.59528		4.54434	2.57631
6.35035	0.156378		0.309501	0.042031		6.35035	0.309501
5.95334	5.77618		0.50797	5.51286		5.95334	0.50797
3.74299	4.77854		1.07178	0.154005		3.74299	1.07178
5.59164	3.30279		0.236855	2.56809		5.59164	0.236855
5.57928	2.47274		0.216994	0.093251		5.57928	0.216994
4.57232	5.12095		2.10577	2.68376		4.57232	2.10577
5.63873	2.1859		0.360087	0.573198		5.63873	0.360087
0.781996	5.79602		3.48452	0.504913		0.781996	3.48452
4.1454	3.12378		0.209951	0.432898		4.1454	0.209951
0.994468	5.42785		1.71653	0.755617		0.994468	1.71653
3.92828	5.75502		1.92349	0.168452		3.92828	1.92349
0.643456	6.44068		0.479127	5.74442		0.643456	0.479127
6.62301	4.45164		3.60327	3.16602		6.62301	3.60327
5.91442	1.5158		0.32265	7.69522		5.91442	0.32265
0.477641	6.96719		0.495673	0.667533		0.477641	0.495673
0.812475	7.41227		0.030292	0.528148		0.812475	0.030292
2.59306	3.11873		0.105736	0.15838		2.59306	0.105736
2.68869	1.2152		2.05059	0.737547		2.68869	2.05059
6.01212	2.69665		2.24977	1.60675		6.01212	2.24977
1.19862	0.742454		2.94219	1.89773		1.19862	2.94219
3.60338	4.37262		1.41181	2.66809		3.60338	1.41181
4.96899	0.835206		3.27839	3.85163		4.96899	3.27839
3.42597	5.42778		4.32568	2.20632		3.42597	4.32568
7.52451	0.308461		2.15149	3.19103		7.52451	2.15149
5.43067	0.628805		0.535949	1.47818		5.43067	0.535949
0.090885	1.16725		4.34502	3.87085		0.090885	4.34502
0.045669	2.86723		0.030213	5.79818		0.045669	0.030213
4.46182	7.42639		0.945393	2.51888		4.46182	0.945393
0.0755	0.081627		0.116544	0.177702		0.0755	0.116544
4.92975	3.99315		0.104066	1.7055		4.92975	0.104066
2.37088	0.885981		0.179173	0.734303		2.37088	0.179173
3.61412	1.61385		0.602302	0.437202		3.61412	0.602302
7.44434	3.97599		1.87526	1.07501		7.44434	1.87526
5.2047	7.3136		0.76596	0.713559		5.2047	0.76596
4.12767	0.837292		0.21733	0.457154		4.12767	0.21733
3.8292	2.66378		1.82329	3.41698		3.8292	1.82329
1.51865	2.58615		3.75402	1.74266		1.51865	3.75402
3.92889	0.108047		2.13467	0.507369		3.92889	2.13467
2.26136	1.59405		3.84561	1.52531		2.26136	3.84561
4.39846	1.07457		0.265501	2.64961		4.39846	0.265501
3.47665	4.50286		1.4902	0.739535		3.47665	1.4902
0.019537	0.382325		0.812315	4.05476		0.019537	0.812315
0.451412	2.20713		0.380947	0.661564		0.451412	0.380947
7.66885	0.557172		1.4038	0.404111		7.66885	1.4038
6.40787	6.48314		3.01944	2.77445		6.40787	3.01944
0.3642	3.91997		2.88202	3.37414		0.3642	2.88202
4.33155	3.19918		0.155094	0.078494		4.33155	0.155094
4.21214	5.83743		0.438536	0.068685		4.21214	0.438536
0.463736	4.24665		1.46317	0.302388		0.463736	1.46317
0.026974	0.412377		4.44197	0.624388		0.026974	4.44197
0.031652	0.068888		0.738205	1.75503		0.031652	0.738205
0.041279	3.78122		1.60212	0.151267		0.041279	1.60212
0.242644	2.93365		1.30815	1.56257		0.242644	1.30815
4.92421	5.02069		0.493985	0.512288		4.92421	0.493985
6.41881	4.14837		0.305327	0.618539		6.41881	0.305327
1.49302	5.24967		0.080469	1.64787		1.49302	0.080469
3.96899	7.95987		2.56135	6.15957		3.96899	2.56135
4.7655	2.91522		3.55267	5.78726		4.7655	3.55267
2.62631	3.10433		2.3321	3.22975		2.62631	2.3321
0.168607	0.131265		1.29637	0.172349		0.168607	1.29637
1.83807	2.5945		1.78951	3.41338		1.83807	1.78951
5.73825	3.95625		2.99647	0.148037		5.73825	2.99647
0.573054	3.45643		1.38179	3.01728		0.573054	1.38179
3.28526	4.45359		2.31767	3.10218		3.28526	2.31767
3.27113	2.78741		5.48523	0.492026		3.27113	5.48523
4.2229	0.173789		0.103554	1.42754		4.2229	0.103554
5.84949	3.968		2.92047	0.289998		5.84949	2.92047
0.656053	3.50227		0.101408	0.350502		0.656053	0.101408
4.21728	3.02664		0.659913	0.129961		4.21728	0.659913
1.86497	2.75748		0.799612	0.072822		1.86497	0.799612
2.11022	3.34999		2.59085	0.090837		2.11022	2.59085
0.077149	0.601589		0.648844	3.56324		0.077149	0.648844
1.86115	5.49459		3.58645	4.02979		1.86115	3.58645
1.40156	3.30238		0.681849	3.97777		1.40156	0.681849
1.31782	2.51054		1.53596	1.44711		1.31782	1.53596
1.50191	4.11442		3.05802	0.710996		1.50191	3.05802
4.85329	2.35103		2.65635	2.83845		4.85329	2.65635
0.029468	0.564446		1.3281	4.2224		0.029468	1.3281
4.08033	2.90883		3.00536	2.05403		4.08033	3.00536
1.83893	0.393835		0.28685	0.094668		1.83893	0.28685
3.93551	5.25503		0.634531	1.55344		3.93551	0.634531
1.65176	4.07948		2.94849	0.384849		1.65176	2.94849
1.56103	2.96212		0.241314	3.26686		1.56103	0.241314
1.32869	1.15904		1.67052	0.261077		1.32869	1.67052
0.96926	4.09951		0.994975	6.15546		0.96926	0.994975
3.10181	2.70337		0.516201	1.71149		3.10181	0.516201
1.82519	1.0906		1.23696	2.61181		1.82519	1.23696
4.18757	5.32526		1.23728	1.52913		4.18757	1.23728
4.54015	5.37429		3.09517	0.169356		4.54015	3.09517
0.883866	0.246837		2.12901	0.346127		0.883866	2.12901
10.532	5.23156		1.28736	2.6418		10.532	1.28736
2.01885	1.97067		1.24189	3.63097		2.01885	1.24189
0.333273	2.91449		1.76821	1.1459		0.333273	1.76821
0.241539	3.07613		1.30266	0.279812		0.241539	1.30266
5.12365	1.47567		1.93651	0.826555		5.12365	1.93651
0.827125	2.20655		1.75647	0.12422		0.827125	1.75647
0.467735	0.096932		0.812125	2.98164		0.467735	0.812125
1.24452	3.47301		1.29118	0.521467		1.24452	1.29118
5.28161	0.230336		2.41691	2.24509		5.28161	2.41691
0.702257	0.136437		0.790145	0.949486		0.702257	0.790145
1.20125	0.833725		1.16316	7.21664		1.20125	1.16316
3.99298	1.27915		1.32667	2.06863		3.99298	1.32667
1.15769	3.35873		0.532779	2.57783		1.15769	0.532779
1.34521	0.237872		2.14989	4.78656		1.34521	2.14989
0.151276	1.04096		1.92512	4.90966		0.151276	1.92512
4.2557	3.76482		2.68932	3.34196		4.2557	2.68932
0.197445	5.23493		1.19022	2.76614		0.197445	1.19022
4.364	8.69986		7.60531	8.12147		4.364	7.60531
2.35719	0.271836		3.06266	1.90466		2.35719	3.06266
1.80173	3.19907		0.640729	0.066814		1.80173	0.640729
0.083992	3.21925		5.05078	0.846303		0.083992	5.05078
2.94704	0.438689		1.20812	0.98611		2.94704	1.20812
2.55781	3.03888		0.037164	0.743895		2.55781	0.037164
2.5676	0.089219		2.99486	1.37577		2.5676	2.99486
1.51658	4.60329		5.72271	2.20833		1.51658	5.72271
6.19622	6.06608		3.363	0.15609		6.19622	3.363
0.541223	0.106012		0.370749	2.61549		0.541223	0.370749
0.867787	0.496798		1.58879	0.05904		0.867787	1.58879
0.758239	0.318689		0.336029	2.16923		0.758239	0.336029
3.73298	0.357151		1.52235	0.169477		3.73298	1.52235
2.96955	3.65314		0.667887	3.69356		2.96955	0.667887
1.55618	2.60821		0.057862	0.921514		1.55618	0.057862
6.08852	4.80612		0.221318	2.86588		6.08852	0.221318
1.25739	2.73415		5.13751	0.6697		1.25739	5.13751
4.58547	5.00446		1.46832	1.09452		4.58547	1.46832
4.08378	3.08827		0.924146	0.434819		4.08378	0.924146
0.352366	5.31188		1.45135	0.07981		0.352366	1.45135
1.97479	2.4573		0.535717	1.99592		1.97479	0.535717
0.948907	5.08898		0.869329	1.2063		0.948907	0.869329
4.46259	2.63032		7.40474	1.53629		4.46259	7.40474
1.38426	3.89161		4.77461	3.69278		1.38426	4.77461
2.78411	4.9242		3.72989	2.04434		2.78411	3.72989
0.856642	4.33262		3.63749	4.24041		0.856642	3.63749
5.30974	0.152238		3.43526	1.77246		5.30974	3.43526
2.10779	6.72191		0.564069	2.85427		2.10779	0.564069
2.83209	1.79146		0.926258	2.03256		2.83209	0.926258
4.17351	1.39117		1.31761	3.06243		4.17351	1.31761
4.39775	3.87053		0.433583	3.38856		4.39775	0.433583
3.54637	4.70572		1.84087	0.047545		3.54637	1.84087
4.37622	2.3544		2.10239	0.184805		4.37622	2.10239
0.141452	0.217026		0.183085	0.298087		0.141452	0.183085
0.427411	1.11459		0.02178	4.92309		0.427411	0.02178
3.76595	4.41827		2.93288	1.34587		3.76595	2.93288
0.374426	2.70763		0.883539	3.86152		0.374426	0.883539
5.04894	4.73751		0.745493	2.74358		5.04894	0.745493
2.85025	2.63431		0.404931	1.19756		2.85025	0.404931
0.752989	1.08267		2.66948	2.40452		0.752989	2.66948
4.07053	6.37426		0.852736	4.48404		4.07053	0.852736
5.48584	0.120692		2.28525	0.046492		5.48584	2.28525
1.65244	2.87733		0.277658	2.72517		1.65244	0.277658
5.63352	1.01902		0.74276	0.314619		5.63352	0.74276
7.47712	0.186833		0.343664	3.50158		7.47712	0.343664
3.65531	1.34356		0.279196	3.69321		3.65531	0.279196
3.83931	0.172416		2.15131	0.112576		3.83931	2.15131
0.854994	1.72515		2.36825	1.93593		0.854994	2.36825
5.07943	2.38737		0.367759	1.55501		5.07943	0.367759
1.78963	0.623233		0.382698	1.2299		1.78963	0.382698
3.3655	4.01187		3.5664	0.897814		3.3655	3.5664
3.66525	4.63865		1.4732	3.18695		3.66525	1.4732
2.56836	0.215572		0.283465	4.46586		2.56836	0.283465
1.52614	0.55371		0.973113	1.372		1.52614	0.973113
2.91325	2.05059		1.14815	4.29423		2.91325	1.14815
0.818696	8.90359		1.25963	1.0207		0.818696	1.25963
3.82956	5.44376		1.12682	0.86804		3.82956	1.12682
0.527088	2.89676		1.44528	1.13555		0.527088	1.44528
3.93078	0.393445		2.28486	1.77922		3.93078	2.28486
4.30111	4.75231		0.587347	0.064643		4.30111	0.587347
1.6832	2.91716		1.2721	2.50888		1.6832	1.2721
6.26661	5.89339		0.978502	1.34352		6.26661	0.978502
4.78645	4.43538		0.059481	4.94706		4.78645	0.059481
0.623455	4.32898		0.363259	2.68757		0.623455	0.363259
0.282003	2.70721		2.07942	5.92654		0.282003	2.07942
6.14965	3.3736		2.41711	1.3765		6.14965	2.41711
1.39043	3.11658		1.64743	3.49681		1.39043	1.64743
0.829178	3.51533		1.50667	0.514045		0.829178	1.50667
0.858673	2.03695		1.2658	0.656041		0.858673	1.2658
3.35727	3.17773		0.472475	4.29874		3.35727	0.472475
2.66748	0.344101		4.05909	4.70404		2.66748	4.05909
2.60158	2.57572		5.6246	1.79916		2.60158	5.6246
1.47135	4.02549		0.271819	0.766949		1.47135	0.271819
3.87931	1.18328		0.93534	1.48283		3.87931	0.93534
2.19113	4.07941		2.64163	1.21043		2.19113	2.64163
5.93572	0.065743		1.5794	0.23485		5.93572	1.5794
3.93344	3.23684		0.315715	0.192689		3.93344	0.315715
4.01966	1.50032		1.02943	1.28698		4.01966	1.02943
4.1948	0.208965		2.6305	2.15389		4.1948	2.6305
2.71974	0.094883		0.634368	0.345484		2.71974	0.634368
2.84475	0.341387		2.89848	0.869187		2.84475	2.89848
1.8101	4.2701		0.322552	3.26038		1.8101	0.322552
1.68062	10.5664		0.080045	0.424493		1.68062	0.080045
4.95681	3.54295		5.32416	2.20768		4.95681	5.32416
5.59578	0.878247		3.07898	0.914059		5.59578	3.07898
1.7132	4.1387		2.04973	2.36661		1.7132	2.04973
3.67991	0.371329		0.448108	0.310783		3.67991	0.448108
12.4277	4.58832		3.69608	0.319108		12.4277	3.69608
0.703628	6.4946		4.62759	0.329524		0.703628	4.62759
2.01089	4.31158		0.116214	0.934865		2.01089	0.116214
3.01592	2.65225		1.14173	0.308719		3.01592	1.14173
0.322089	2.35999		3.00157	0.263409		0.322089	3.00157
0.808064	0.065734		0.312188	0.298381		0.808064	0.312188
3.58497	5.72859		0.429527	2.10897		3.58497	0.429527
1.47295	1.47318		0.535161	0.495007		1.47295	0.535161
3.51312	3.60871		2.57234	0.768527		3.51312	2.57234
2.77231	0.446774		2.88377	3.30871		2.77231	2.88377
4.16049	0.804789		0.093153	2.85942		4.16049	0.093153
3.33343	1.22157		1.70196	1.51268		3.33343	1.70196
2.34171	0.027976		0.504728	2.52635		2.34171	0.504728
2.46092	5.04431		3.83964	1.01018		2.46092	3.83964
2.02764	3.34451		1.56422	0.430961		2.02764	1.56422
3.76924	1.12725		0.155301	1.15322		3.76924	0.155301
0.431439	0.762887		1.49351	0.399682		0.431439	1.49351
3.51861	4.31731		1.07563	0.928026		3.51861	1.07563
4.89904	0.309067		1.38097	3.39617		4.89904	1.38097
2.09307	0.150328		0.128315	0.365266		2.09307	0.128315
0.051698	2.80641		7.78189	0.613051		0.051698	7.78189
1.74199	5.2056		0.713815	0.114947		1.74199	0.713815
1.83148	5.34399		2.52315	4.82664		1.83148	2.52315
1.10009	4.23396		1.14651	0.404062		1.10009	1.14651
1.7052	1.49161		2.47338	4.14392		1.7052	2.47338
3.19861	4.73271		4.70856	3.46924		3.19861	4.70856
3.02844	6.67216		0.087077	2.94461		3.02844	0.087077
4.25612	3.91025		0.630813	7.87678		4.25612	0.630813
4.9672	7.81536		0.300811	0.566367		4.9672	0.300811
3.19261	3.74818		0.053631	1.82037		3.19261	0.053631
2.46871	6.29015		6.21559	3.51159		2.46871	6.21559
0.267222	2.74089		0.380917	0.698401		0.267222	0.380917
0.10887	5.69491		0.206584	0.061808		0.10887	0.206584
0.913199	3.16638		2.76843	6.99603		0.913199	2.76843
1.82849	2.33808		0.679581	0.703879		1.82849	0.679581
0.84427	1.58944		1.9041	1.5342		0.84427	1.9041
3.68608	2.2667		1.60725	3.10804		3.68608	1.60725
2.99759	5.02278		1.64348	6.04199		2.99759	1.64348
6.76886	5.7928		1.94964	1.99839		6.76886	1.94964
4.18643	5.40963		0.165704	3.92048		4.18643	0.165704
5.65995	2.84753		2.56376	2.11914		5.65995	2.56376
5.68082	4.63268		2.49619	4.57501		5.68082	2.49619
0.119624	6.30652		0.571557	0.555253		0.119624	0.571557
5.35619	4.44319		0.688999	6.14072		5.35619	0.688999
2.53769	3.5114		1.95485	3.09869		2.53769	1.95485
2.75758	2.50942		1.85714	0.333228		2.75758	1.85714
2.2945	9.12381		0.174496	2.80274		2.2945	0.174496
2.05117	0.151016		0.115221	1.66325		2.05117	0.115221
3.58974	4.03106		0.965015	1.44017		3.58974	0.965015
3.62579	3.17101		1.91671	1.21718		3.62579	1.91671
7.16918	0.388475		0.110451	0.742067		7.16918	0.110451
1.7248	5.5968		2.24828	1.91026		1.7248	2.24828
2.90832	0.572034		1.08628	0.715256		2.90832	1.08628
4.62558	5.6523		3.15803	0.101179		4.62558	3.15803
1.01571	0.487273		2.06917	0.967549		1.01571	2.06917
0.280058	3.54443		1.96141	0.075663		0.280058	1.96141
2.56229	1.06111		0.274453	0.31497		2.56229	0.274453
2.40302	3.55911		0.436049	1.88102		2.40302	0.436049
0.697934	3.21884		0.725711	0.046262		0.697934	0.725711
5.3956	4.14806		1.79436	1.05878		5.3956	1.79436
5.92726	5.90629		1.65679	2.00118		5.92726	1.65679
1.85214	2.45425		0.307088	0.368061		1.85214	0.307088
4.09415	5.12724		1.06295	1.15706		4.09415	1.06295
3.08268	2.00659		0.087334	1.3819		3.08268	0.087334
1.88233	1.63716		2.19116	1.58971		1.88233	2.19116
0.122235	6.18678		2.01573	0.464001		0.122235	2.01573
5.34006	1.80494		4.06361	0.310643		5.34006	4.06361
2.50201	5.98893		0.330835	0.942031		2.50201	0.330835
5.06145	0.639648		1.28591	2.49362		5.06145	1.28591
1.27812	2.7137		0.308367	2.13006		1.27812	0.308367
2.87765	6.93861		0.44685	2.15536		2.87765	0.44685
2.95894	5.01699		0.105016	0.07486		2.95894	0.105016
5.99741	3.37272		2.03309	3.38631		5.99741	2.03309
2.1057	5.14028		0.194799	3.04931		2.1057	0.194799
0.695023	4.68237		1.48243	2.02665		0.695023	1.48243
5.33669	3.70876		2.99749	1.24163		5.33669	2.99749
7.21647	0.200996		2.30333	2.36368		7.21647	2.30333
6.78798	2.6513		3.08489	0.07479		6.78798	3.08489
7.35513	3.83268		0.195995	1.01588		7.35513	0.195995
0.287535	5.52201		0.104474	2.59774		0.287535	0.104474
3.7685	5.84952		2.97619	0.3063		3.7685	2.97619
7.43187	4.79582		1.82984	4.16574		7.43187	1.82984
3.43488	4.44653		1.27791	0.60964		3.43488	1.27791
3.51476	1.54146		0.13296	4.91302		3.51476	0.13296
2.14266	1.30967		0.194929	1.29286		2.14266	0.194929
6.46946	0.55371		6.91708	2.91816		6.46946	6.91708
4.22748	0.521655		1.73363	0.375041		4.22748	1.73363
7.52886	1.92329		0.108636	3.89005		7.52886	0.108636
0.280842	2.42887		0.810533	1.53818		0.280842	0.810533
4.54943	3.40239		0.10638	2.91135		4.54943	0.10638
1.5589	4.3796		4.14936	0.439176		1.5589	4.14936
0.257999	1.35697		2.33148	3.55197		0.257999	2.33148
0.288609	0.347037		0.332331	2.80861		0.288609	0.332331
1.05113	4.57288		1.3581	1.70446		1.05113	1.3581
2.57457	3.93906		0.078864	1.55499		2.57457	0.078864
0.071921	3.59022		0.26047	1.45151		0.071921	0.26047
0.514916	2.69875		3.97808	1.18953		0.514916	3.97808
2.25098	6.4258		0.906454	0.414762		2.25098	0.906454
5.29609	1.97392		2.51561	0.441079		5.29609	2.51561
1.91596	3.41228		0.464394	4.44249		1.91596	0.464394
4.31602	0.256545		3.41681	3.18472		4.31602	3.41681
5.07852	3.87706		1.13224	0.427235		5.07852	1.13224
4.75515	2.63978		2.26283	1.31886		4.75515	2.26283
1.03627	4.10058		4.30699	0.966303		1.03627	4.30699
0.595317	3.9265		1.79004	3.48236		0.595317	1.79004
2.66928	4.8763		0.248639	1.90987		2.66928	0.248639
5.53531	3.451		0.056674	0.06712		5.53531	0.056674
2.33854	0.532992		2.5222	3.9012		2.33854	2.5222
0.072159	0.787762		0.0552	1.64147		0.072159	0.0552
3.98537	2.04915		1.05985	0.06497		3.98537	1.05985
2.69073	4.0615		3.49288	1.59101		2.69073	3.49288
4.94267	5.94029		1.13063	0.732511		4.94267	1.13063
1.6329	3.94899		1.12007	0.584899		1.6329	1.12007
3.16529	0.087342		1.89013	0.143325		3.16529	1.89013
3.14292	0.499824		0.784204	1.71168		3.14292	0.784204
2.62461	0.057151		0.720058	0.824278		2.62461	0.720058
4.44086	0.119431		5.77852	0.220721		4.44086	5.77852
3.14974	5.16725		1.32199	6.19591		3.14974	1.32199
4.40138	3.69562		6.48226	0.205998		4.40138	6.48226
0.90462	2.40922		2.34823	0.962217		0.90462	2.34823
5.6645	0.155965		5.83826	1.56769		5.6645	5.83826
0.163286	2.97969		7.56996	1.91908		0.163286	7.56996
3.26701	7.9051		0.270321	2.33235		3.26701	0.270321
1.73472	0.385947		1.24034	1.20147		1.73472	1.24034
0.126672	2.70186		0.014371	2.08017		0.126672	0.014371
1.05377	2.53251		0.512559	0.355584		1.05377	0.512559
5.38502	0.424707		1.29276	1.9974		5.38502	1.29276
3.06641	6.75521		0.767816	0.365803		3.06641	0.767816
3.47166	3.64011		0.791243	0.361804		3.47166	0.791243
5.74071	2.84928		0.171548	0.087616		5.74071	0.171548
4.81539	0.604236		3.91515	0.71258		4.81539	3.91515
2.98289	2.21654		1.96719	0.130392		2.98289	1.96719
1.67075	6.85444		2.43822	1.13142		1.67075	2.43822
0.982774	0.037223		0.138742	1.93887		0.982774	0.138742
3.19804	2.8112		3.83497	0.417856		3.19804	3.83497
3.05106	4.64167		3.33795	0.978399		3.05106	3.33795
0.250344	5.11183		5.23625	1.06948		0.250344	5.23625
1.28524	0.325525		1.98036	0.601527		1.28524	1.98036
1.14824	1.09423		0.19722	1.54045		1.14824	0.19722
4.8791	3.8857		0.899323	3.02955		4.8791	0.899323
4.55572	4.25209		1.0316	1.18015		4.55572	1.0316
0.047217	4.2663		0.577324	1.94193		0.047217	0.577324
1.42297	1.24707		2.71169	1.95871		1.42297	2.71169
6.53338	0.144506		4.40356	1.56117		6.53338	4.40356
3.80535	3.52754		2.57003	0.221215		3.80535	2.57003
3.19199	5.56373		0.138206	3.41853		3.19199	0.138206
1.31278	1.38733		0.445429	4.6756		1.31278	0.445429
0.369406	3.67506		0.268254	1.03132		0.369406	0.268254
5.7097	2.77348		1.57971	8.1273		5.7097	1.57971
1.68315	3.80047		1.61329	3.31927		1.68315	1.61329
3.59948	1.33073		0.44269	0.62999		3.59948	0.44269
2.96132	0.171308		0.072131	0.063072		2.96132	0.072131
6.04307	0.916312		0.627088	3.00128		6.04307	0.627088
3.34866	4.08127		0.926667	0.713514		3.34866	0.926667
2.64311	3.07141		0.788617	0.448637		2.64311	0.788617
0.694188	2.93996		0.701024	3.24896		0.694188	0.701024
2.89665	1.55044		0.240069	0.71552		2.89665	0.240069
2.28575	3.58706		0.40307	0.48968		2.28575	0.40307
0.700053	1.88165		0.277999	2.1283		0.700053	0.277999
0.721449	2.98557		1.90164	0.170458		0.721449	1.90164
2.3815	3.62751		4.21649	1.3187		2.3815	4.21649
5.74056	0.966174		3.70635	1.00936		5.74056	3.70635
3.78981	0.108187		1.19234	0.177015		3.78981	1.19234
0.591361	3.9695		0.943674	1.15374		0.591361	0.943674
2.63368	0.183315		0.480023	2.1667		2.63368	0.480023
0.921832	4.25705		1.65698	3.6282		0.921832	1.65698
3.15004	0.506259		1.77204	1.51365		3.15004	1.77204
3.99419	4.14723		3.67135	1.75091		3.99419	3.67135
4.37939	4.7417		1.17858	0.498726		4.37939	1.17858
1.99732	0.731387		3.10441	1.03244		1.99732	3.10441
0.54305	3.6595		2.53234	1.88673		0.54305	2.53234
3.47155	0.812763		0.177114	1.99764		3.47155	0.177114
1.40173	4.67382		0.110161	2.26092		1.40173	0.110161
0.359811	3.19832		5.38717	1.67407		0.359811	5.38717
3.93718	1.12479		4.02328	2.80115		3.93718	4.02328
4.9672	6.00695		2.80843	4.47848		4.9672	2.80843
3.98641	2.70459		0.341707	3.5954		3.98641	0.341707
3.02409	0.114051		0.091531	0.108673		3.02409	0.091531
3.98204	8.20837		2.23954	0.682847		3.98204	2.23954
0.278537	6.54531		5.62767	1.19772		0.278537	5.62767
0.738892	1.35991		1.43089	1.02669		0.738892	1.43089
2.69153	5.48451		0.158787	6.30423		2.69153	0.158787
3.73469	2.68357		0.458583	2.54305		3.73469	0.458583
2.10335	2.84611		0.877839	1.49896		2.10335	0.877839
0.724346	2.75242		0.166843	2.44672		0.724346	0.166843
2.68896	2.56993		0.408376	0.123747		2.68896	0.408376
5.65515	6.72163		0.177876	1.01733		5.65515	0.177876
3.52345	5.71136		3.29203	3.01905		3.52345	3.29203
3.13884	0.144506		4.04318	3.68013		3.13884	4.04318
0.197084	2.73752		0.904801	0.108904		0.197084	0.904801
3.51713	6.6894		1.13613	9.12334		3.51713	1.13613
6.34704	2.87946		0.103249	0.787483		6.34704	0.103249
3.39728	4.96714		0.919257	6.28406		3.39728	0.919257
6.18847	4.67862		0.144907	2.10067		6.18847	0.144907
2.78855	0.839983		1.67514	1.06538		2.78855	1.67514
5.40372	5.64343		3.1017	3.62581		5.40372	3.1017
2.13447	0.883195		2.40785	1.9316		2.13447	2.40785
0.825542	1.32155		0.671615	0.315485		0.825542	0.671615
3.34762	4.0603		0.563226	1.72644		3.34762	0.563226
3.17227	0.8167		0.210032	0.172338		3.17227	0.210032
0.008904	5.25866		3.5398	3.5113		0.008904	3.5398
1.08431	0.472513		2.71845	0.69035		1.08431	2.71845
1.82582	3.58311		0.078805	1.50539		1.82582	0.078805
3.59438	0.35359		1.12173	0.023719		3.59438	1.12173
2.48589	3.32798		0.074879	3.3139		2.48589	0.074879
0.180096	5.90151		3.14836	0.177256		0.180096	3.14836
5.09797	0.759393		2.44548	4.81433		5.09797	2.44548
1.13384	0.134877		0.39619	1.34933		1.13384	0.39619
1.18181	1.80594		0.217978	4.07418		1.18181	0.217978
1.27742	0.162981		0.210625	2.41227		1.27742	0.210625
0.177845	1.31869		3.05974	7.07572		0.177845	3.05974
1.52893	2.67054		0.735075	0.951769		1.52893	0.735075
2.73502	8.10327		0.083118	3.18021		2.73502	0.083118
4.22016	0.910608		7.38523	3.29691		4.22016	7.38523
0.774117	4.74927		0.271465	1.89424		0.774117	0.271465
1.1236	2.86343		0.340353	1.65516		1.1236	0.340353
4.26537	2.85311		0.301442	0.049259		4.26537	0.301442
0.540815	3.51005		0.069687	0.032235		0.540815	0.069687
0.128288	0.479907		0.190162	0.404945		0.128288	0.190162
0.389002	5.98341		4.06972	0.883334		0.389002	4.06972
3.63537	1.73529		1.51319	2.16447		3.63537	1.51319
0.427039	3.25863		0.555144	0.903641		0.427039	0.555144
2.9593	3.71356		1.47404	0.279993		2.9593	1.47404
0.06687	4.69662		0.586079	0.202448		0.06687	0.586079
0.061543	0.25819		0.025471	4.69947		0.061543	0.025471
2.81323	3.06149		2.87983	2.23916		2.81323	2.87983
2.20124	3.01051		3.48316	0.461934		2.20124	3.48316
6.32537	2.21787		1.10055	0.311517		6.32537	1.10055
3.68254	0.08996		0.853969	2.85719		3.68254	0.853969
2.61536	2.64231		5.67756	0.067526		2.61536	5.67756
6.09185	2.42964		4.89348	3.46856		6.09185	4.89348
0.200524	2.9257		0.774039	0.219094		0.200524	0.774039
1.07525	0.743224		0.316636	3.78852		1.07525	0.316636
2.92226	6.20964		0.724522	3.13565		2.92226	0.724522
3.78145	3.66623		1.48224	5.17226		3.78145	1.48224
3.96865	3.06348		0.669905	0.470238		3.96865	0.669905
0.475797	6.75073		0.25142	2.33424		0.475797	0.25142
2.94097	4.97335		0.268636	5.3056		2.94097	0.268636
7.84097	4.20493		3.81927	1.51815		7.84097	3.81927
0.136182	5.0582		2.95615	0.060464		0.136182	2.95615
1.32908	4.93465		0.795186	2.26251		1.32908	0.795186
5.07759	3.5094		0.18473	3.05441		5.07759	0.18473
1.68221	4.69645		2.55881	1.43003		1.68221	2.55881
1.15334	2.39967		0.335244	2.17455		1.15334	0.335244
1.49218	4.46432		2.28413	2.3893		1.49218	2.28413
4.45515	1.42194		0.01732	0.541243		4.45515	0.01732
1.2609	5.41319		0.559943	0.167223		1.2609	0.559943
2.83363	0.29659		0.971982	0.353106		2.83363	0.971982
5.62693	3.04406		4.09365	1.28733		5.62693	4.09365
2.26383	0.9506		0.11944	0.998459		2.26383	0.11944
1.51502	3.73903		3.90275	1.23721		1.51502	3.90275
2.72509	3.44563		0.069749	4.03417		2.72509	0.069749
4.02422	0.062556		3.22846	0.79345		4.02422	3.22846
2.73093	5.96445		0.283479	0.07588		2.73093	0.283479
3.35546	4.32386		0.855213	4.74609		3.35546	0.855213
0.490148	1.83902		0.138733	5.20927		0.490148	0.138733
3.455	5.74221		2.86339	0.748531		3.455	2.86339
1.68205	0.278782		2.81565	4.50471		1.68205	2.81565
1.40252	6.71646		2.68221	2.97728		1.40252	2.68221
0.284808	0.813149		4.36262	3.39033		0.284808	4.36262
1.92913	0.106827		0.12219	0.539488		1.92913	0.12219
2.16899	3.54889		2.46025	1.12382		2.16899	2.46025
0.448717	2.74607		0.118467	2.30552		0.448717	0.118467
0.848432	5.3335		0.292276	3.98175		0.848432	0.292276
3.14808	2.67259		0.223048	4.29684		3.14808	0.223048
0.899352	4.8062		0.36405	0.292852		0.899352	0.36405
2.49198	3.69544		4.64003	4.02468		2.49198	4.64003
3.44545	5.0054		0.877378	0.522458		3.44545	0.877378
5.35895	1.62769		0.471256	1.93587		5.35895	0.471256
0.250529	6.07038		4.63806	0.09807		0.250529	4.63806
0.756917	0.030378		3.79116	3.33074		0.756917	3.79116
3.06319	2.06125		6.84379	0.054942		3.06319	6.84379
2.40362	3.94766		0.388101	3.63985		2.40362	0.388101
0.775287	4.09915		2.34753	2.85456		0.775287	2.34753
1.00121	1.07607		2.3606	3.42727		1.00121	2.3606
2.04043	5.95792		2.75132	0.277028		2.04043	2.75132
3.78825	1.28943		2.06121	1.03995		3.78825	2.06121
4.21962	0.981878		0.47676	3.27137		4.21962	0.47676
2.84483	1.15283		0.31564	4.10659		2.84483	0.31564
2.77746	0.383763		1.13727	0.325771		2.77746	1.13727
1.17527	0.797827		3.62207	6.74954		1.17527	3.62207
2.84164	0.993475		1.75124	0.986053		2.84164	1.75124
1.64093	3.55865		1.81463	4.70294		1.64093	1.81463
0.451014	7.13333		4.40151	1.08226		0.451014	4.40151
4.26408	2.48858		2.22915	0.961398		4.26408	2.22915
1.96184	5.70516		2.41759	10.3443		1.96184	2.41759
0.326139	0.950983		2.01861	1.01692		0.326139	2.01861
4.13855	7.45854		0.344882	2.63481		4.13855	0.344882
6.80835	0.691419		1.41299	0.71004		6.80835	1.41299
0.02391	1.25476		1.20363	0.436184		0.02391	1.20363
0.868507	0.059112		1.51055	3.87539		0.868507	1.51055
3.02842	6.25975		0.481124	2.7542		3.02842	0.481124
3.19448	4.19491		0.417277	0.663965		3.19448	0.417277
2.3772	4.02235		2.84931	1.86621		2.3772	2.84931
6.02622	4.67766		0.032571	4.26686		6.02622	0.032571
1.07995	1.26187		0.362695	1.04954		1.07995	0.362695
7.73247	2.32256		1.66987	1.23101		7.73247	1.66987
2.75856	2.2817		1.03041	3.12257		2.75856	1.03041
0.109192	1.3497		0.219174	2.25751		0.109192	0.219174
5.37908	1.00886		1.56144	0.554926		5.37908	1.56144
3.62129	2.73536		4.75707	1.05493		3.62129	4.75707
3.29085	5.23803		0.24098	1.54518		3.29085	0.24098
0.882649	3.71245		0.862449	2.6333		0.882649	0.862449
6.52974	0.364		0.075026	0.053453		6.52974	0.075026
2.44448	1.70587		3.04209	0.154247		2.44448	3.04209
2.74276	1.12301		0.22652	3.00333		2.74276	0.22652
1.32987	5.55005		2.66053	0.099827		1.32987	2.66053
3.58209	5.72224		1.90351	0.129875		3.58209	1.90351
1.07376	2.74874		2.53601	0.735604		1.07376	2.53601
0.286784	2.80463		0.075826	2.25499		0.286784	0.075826
6.05478	4.59757		0.47398	2.62795		6.05478	0.47398
0.375749	0.096312		2.40943	0.348323		0.375749	2.40943
5.91398	0.260961		0.307579	1.21372		5.91398	0.307579
4.45869	0.055079		1.03607	1.47222		4.45869	1.03607
4.55462	5.60594		2.46835	0.744949		4.55462	2.46835
4.21472	2.51046		3.1189	5.12988		4.21472	3.1189
3.10586	1.4057		2.77431	0.436135		3.10586	2.77431
6.36015	3.86668		4.8058	4.71915		6.36015	4.8058
3.03714	4.03093		2.45327	1.53974		3.03714	2.45327
6.92522	3.88732		0.084164	1.90425		6.92522	0.084164
0.31306	2.08549		1.52073	3.00399		0.31306	1.52073
2.06464	2.89443		4.12738	4.09186		2.06464	4.12738
0.188534	3.87873		0.023693	0.985306		0.188534	0.023693
4.684	3.25692		0.140233	3.5059		4.684	0.140233
3.94847	0.061498		0.939505	1.87219		3.94847	0.939505
3.3443	4.39219		0.156261	1.00762		3.3443	0.156261
3.46366	5.29763		0.094229	2.3831		3.46366	0.094229
3.57781	1.02931		1.34784	2.90565		3.57781	1.34784
0.621325	8.45388		0.918551	3.35313		0.621325	0.918551
0.762924	0.630957		0.068983	2.08398		0.762924	0.068983
0.395013	4.12754		4.13218	0.189014		0.395013	4.13218
1.96004	0.02312		0.465849	4.33492		1.96004	0.465849
0.212569	3.07678		0.322708	4.18383		0.212569	0.322708
4.64157	1.66701		0.527283	4.60032		4.64157	0.527283
3.79199	4.83653		1.79572	1.58428		3.79199	1.79572
2.77083	5.88524		0.153096	2.47387		2.77083	0.153096
6.32035	2.10008		2.08325	0.320444		6.32035	2.08325
1.98212	4.54789		0.049408	3.57497		1.98212	0.049408
6.71452	4.52363		0.603663	0.726979		6.71452	0.603663
6.20653	3.18885		0.191323	0.60685		6.20653	0.191323
0.27559	5.16134		3.12124	5.38767		0.27559	3.12124
0.205949	2.22016		0.066241	3.80292		0.205949	0.066241
3.13853	7.10457		0.270381	7.3905		3.13853	0.270381
1.4387	4.32729		0.05851	0.212969		1.4387	0.05851
5.6798	4.73881		5.58072	1.88463		5.6798	5.58072
1.12961	6.0919		0.17607	1.32547		1.12961	0.17607
3.44439	0.364812		0.574945	2.67159		3.44439	0.574945
5.54591	8.77633		1.00655	2.48015		5.54591	1.00655
4.22211	0.431061		7.06765	0.028906		4.22211	7.06765
0.399764	2.42946		0.151702	8.02929		0.399764	0.151702
2.34953	0.587556		0.888332	4.11046		2.34953	0.888332
3.72689	4.99055		0.125783	1.74019		3.72689	0.125783
0.084964	0.318599		0.72505	1.04946		0.084964	0.72505
3.02103	5.39591		2.56721	2.68946		3.02103	2.56721
5.20783	4.72365		0.256698	2.14688		5.20783	0.256698
5.46514	0.038005		0.302255	0.952986		5.46514	0.302255
4.12791	1.9648		0.313398	6.41096		4.12791	0.313398
4.13067	3.75397		0.096404	1.41963		4.13067	0.096404
3.88351	0.402749		0.039656	4.10584		3.88351	0.039656
5.30524	0.166498		0.201325	1.06968		5.30524	0.201325
4.53253	5.24092		2.0472	3.57608		4.53253	2.0472
3.69152	5.07579		0.466449	0.971681		3.69152	0.466449
6.22485	0.971843		1.481	1.67259		6.22485	1.481
0.239191	5.79007		2.25321	0.750374		0.239191	2.25321
2.92558	2.78958		3.71414	2.24005		2.92558	3.71414
1.60642	0.863756		0.705957	1.05013		1.60642	0.705957
5.15493	2.59616		0.491482	2.33543		5.15493	0.491482
4.1373	0.239041		0.777229	3.99576		4.1373	0.777229
2.23144	0.262781		5.86884	3.01926		2.23144	5.86884
4.12003	1.09386		1.06868	0.57411		4.12003	1.06868
3.59519	0.276615		0.091589	0.166187		3.59519	0.091589
0.340068	2.05303		3.54146	3.78231		0.340068	3.54146
2.20375	1.66003		2.67036	2.78065		2.20375	2.67036
3.7591	3.07122		1.57845	1.22188		3.7591	1.57845
4.85946	0.147785		0.475025	0.113331		4.85946	0.475025
5.09912	3.82987		1.77771	1.51891		5.09912	1.77771
0.894168	0.519183		0.528528	0.548722		0.894168	0.528528
1.73361	0.79282		3.48452	1.02464		1.73361	3.48452
3.33892	7.72756		4.3717	2.75983		3.33892	4.3717
0.432625	2.44386		3.46855	2.41114		0.432625	3.46855
0.65995	0.139426		0.068411	2.67141		0.65995	0.068411
3.77093	5.40479		0.813127	0.108769		3.77093	0.813127
5.45108	3.38291		0.078401	3.11129		5.45108	0.078401
0.407527	0.29963		3.1606	5.653		0.407527	3.1606
6.69726	3.5327		0.620782	4.87271		6.69726	0.620782
0.299037	3.3594		2.2911	1.93394		0.299037	2.2911
9.04677	0.432118		0.262648	0.47099		9.04677	0.262648
0.25952	0.453234		0.473881	1.31042		0.25952	0.473881
4.7743	0.85856		1.33707	4.8486		4.7743	1.33707
2.71583	5.56289		0.119003	0.792385		2.71583	0.119003
5.92216	4.16239		4.14763	0.447349		5.92216	4.14763
2.24074	3.06958		0.903422	0.11953		2.24074	0.903422
0.410032	3.26256		2.46804	0.080501		0.410032	2.46804
1.99896	6.59254		2.62221	1.37613		1.99896	2.62221
3.19958	2.2974		2.38484	2.74341		3.19958	2.38484
4.91777	3.66625		1.69738	4.86135		4.91777	1.69738
11.025	1.037		1.05345	4.25828		11.025	1.05345
2.88439	2.69171		0.116076	0.552163		2.88439	0.116076
2.21473	2.30829		3.10964	3.5328		2.21473	3.10964
3.06365	3.82279		0.358519	1.62462		3.06365	0.358519
0.507155	6.03648		2.69478	4.98605		0.507155	2.69478
3.65818	4.41241		0.67466	0.367701		3.65818	0.67466
1.1056	2.72105		1.52175	0.684903		1.1056	1.52175
1.55731	5.93301		0.719234	1.71314		1.55731	0.719234
3.32395	5.18823		0.269156	4.66012		3.32395	0.269156
1.61616	3.97468		2.83826	7.11327		1.61616	2.83826
5.98656	2.3085		0.067004	0.87343		5.98656	0.067004
0.787692	0.017627		2.1191	0.701899		0.787692	2.1191
3.6952	0.529107		2.66877	0.130052		3.6952	2.66877
0.795723	2.18228		3.59117	1.57793		0.795723	3.59117
1.76268	0.973652		1.47233	4.45569		1.76268	1.47233
3.44	1.80279		0.364978	4.34475		3.44	0.364978
8.401	4.65847		0.14973	0.229531		8.401	0.14973
1.52447	2.30974		0.152517	4.22618		1.52447	0.152517
0.08577	2.20473			0.51161		0.08577	0.327129
3.58879	4.00539			0.290706		3.58879	0.346552
2.57783	0.063814			0.676082		2.57783	0.144029
1.18314	0.309114			1.86987		1.18314	1.02947
3.75563	2.42653			0.105005		3.75563	3.14967
0.632497	3.6177			0.583707		0.632497	0.095407
4.34201	2.1503			0.613004		4.34201	0.083004
1.81849	2.83546			0.02509		1.81849	0.287433
0.084101	6.14551			1.00572		0.084101	0.668732
2.93423	0.872829			0.219473		2.93423	4.73849
2.45601	4.62245			0.210884		2.45601	4.02865
5.63314	0.250974			0.729454		5.63314	1.08938
4.08208	3.7093			0.628265		4.08208	3.43275
1.87344	2.44825			0.125802		1.87344	0.428942
1.38692	1.03738			2.59848		1.38692	5.96947
1.08407	4.2563			4.29656		1.08407	0.430786
0.426722	2.52042			3.98231		0.426722	0.370942
0.588572	5.21156			1.82916		0.588572	0.27087
7.34661	1.24656			0.393996		7.34661	2.78151
4.05589	3.80187			0.277058		4.05589	0.841908
2.53835	2.67749			3.18777		2.53835	1.60554
2.67809	1.10533			1.00047		2.67809	0.220284
4.8068	1.20385			0.206607		4.8068	4.6842
0.333175	0.70952			5.19049		0.333175	0.113303
6.28268	4.54336			1.00745		6.28268	0.287465
3.08386	3.29041			1.47954		3.08386	0.001005
4.21941	0.255298			3.77435		4.21941	0.848083
3.51049	1.20681			1.04686		3.51049	2.2084
3.3114	3.02395			2.80411		3.3114	5.51895
2.52562	0.882787			0.964198		2.52562	2.24293
2.45717	4.6342			0.490266		2.45717	1.81722
2.49222	4.39721			1.215		2.49222	0.187233
2.5759	0.093213			0.677306		2.5759	2.04943
4.34415	1.65647			2.65651		4.34415	0.967708
3.89729	0.193907			4.07296		3.89729	1.70584
3.10635	2.24424			4.85596		3.10635	3.36864
4.37333	4.08226			0.331344		4.37333	0.400842
3.88205	4.09518			4.26456		3.88205	2.12881
1.00164	1.48224			0.34493		1.00164	0.156694
2.79171	3.87128			0.903774		2.79171	0.109882
3.13375	0.579336			0.381399		3.13375	0.121526
2.71601	0.861496			0.398201		2.71601	3.23142
2.47164	4.26319			1.10058		2.47164	0.192914
2.99651	2.89449			1.92691		2.99651	0.129778
5.12602	4.72001			0.359378		5.12602	0.316196
3.34088	0.774098			1.00587		3.34088	0.334374
3.59986	4.38632			4.61724		3.59986	0.534697
3.22923	2.40513			1.55668		3.22923	0.607332
1.92382	0.078824			0.338615		1.92382	0.651273
2.47826	5.69567			5.08002		2.47826	3.5355
3.978	0.064034			1.33472		3.978	2.76243
0.981583	1.764			0.028588		0.981583	0.303803
2.34706	3.927			1.44747		2.34706	2.64835
4.82375	1.60077			3.28717		4.82375	0.292427
3.26562	2.6984			2.19618		3.26562	0.081967
4.22766	2.51256			0.70141		4.22766	0.81953
1.93455	3.50123			2.99832		1.93455	2.24178
2.34804	3.64329			2.77105		2.34804	4.62368
1.71897	0.5346			3.03717		1.71897	1.25577
1.50087	0.265828			8.92029		1.50087	0.109358
5.39916	2.8378			1.01011		5.39916	0.637889
4.09126	0.080075			4.38011		4.09126	6.0449
1.29276	2.51694			4.03075		1.29276	0.09285
3.45308	0.513601			0.325213		3.45308	0.142896
1.82883	0.083591			2.65024		1.82883	6.16167
3.62689	2.85115			2.21116		3.62689	2.66077
1.94983	1.00497			2.77385		1.94983	0.401949
2.15345	4.1673			0.707943		2.15345	1.56904
0.11534	1.83099			3.74482		0.11534	5.1782
3.60901	6.28558			0.156905		3.60901	0.581401
0.526538	0.151091			0.118389		0.526538	4.14441
2.63571	2.32457			2.13867		2.63571	0.188447
0.221959	0.26003			3.33785		0.221959	0.114494
2.8683	0.764047			2.36146		2.8683	0.041223
5.7251	3.82002			1.24686		5.7251	1.17411
3.34567	1.84413			1.79801		3.34567	1.07029
2.66423	2.20137			1.16708		2.66423	0.165961
0.810452	0.363531			1.33156		0.810452	0.953548
1.89149	4.95101			4.90345		1.89149	7.69362
5.96813	5.48071			1.01456		5.96813	0.979455
5.93326	7.70694			1.17819		5.93326	0.533483
0.058486	3.47572			1.23574		0.058486	0.054557
5.12109	1.32652			4.91459		5.12109	1.49645
3.67188	0.827288			5.60461		3.67188	0.153185
0.063419	0.097364			1.63098		0.063419	0.02204
2.84071	2.37071			1.17757		2.84071	4.30765
5.40801	3.26532			2.16363		5.40801	2.04171
5.42384	0.086755			1.44634		5.42384	1.54277
3.3911	2.93101			3.13602		3.3911	3.18621
1.89705	0.404314			0.391896		1.89705	2.08818
2.65107	2.62799			3.51463		2.65107	0.813932
0.225634	5.23851			5.25135		0.225634	3.26359
0.45081	1.79307			1.7478		0.45081	1.50815
4.19674	3.93653			0.347738		4.19674	2.74501
3.88027	4.67017			3.58359		3.88027	2.96261
0.234881	3.73071			3.4303		0.234881	0.339985
4.33149	3.02316			0.901265		4.33149	0.774959
5.07088	3.2943			4.2994		5.07088	0.043276
1.39588	3.82823			1.08382		1.39588	3.19862
1.95858	1.81274			0.634623		1.95858	0.605172
4.86624	1.30644			0.113087		4.86624	0.431994
5.44068	2.11756			0.469145		5.44068	1.37748
4.61677	5.34726			6.23067		4.61677	2.23018
5.68291	0.399956			5.87671		5.68291	5.53475
0.907912	4.27094			1.4686		0.907912	0.822082
5.1242	0.054578			1.03631		5.1242	2.45695
0.62169	3.44936			5.09594		0.62169	0.06427
1.76225	1.14148			2.14604		1.76225	0.564964
1.09033	1.35309			0.382664		1.09033	1.18007
0.484495	2.98001			1.61943		0.484495	0.29818
2.97253	3.68356			0.696225		2.97253	2.91948
4.7339	2.79344			0.951576		4.7339	1.97632
2.94122	2.1176			5.40972		2.94122	0.019175
1.13791	8.9996			3.01619		1.13791	2.20636
1.26015	0.145062			3.29806		1.26015	4.21564
3.51776	2.43058			0.600396		3.51776	0.960929
3.30524	1.37843			4.04483		3.30524	0.877998
0.830818	4.50687			5.25259		0.830818	0.731054
3.93412	3.35827			3.25028		3.93412	0.182589
5.14152	4.06073			0.172601		5.14152	1.30212
2.40068	1.10787			1.43524		2.40068	0.291655
2.68341	0.123232			1.14099		2.68341	0.827702
0.317163	2.22633			3.58585		0.317163	1.82461
3.46289	2.95486			1.69495		3.46289	1.44672
0.55537	4.86617			5.04599		0.55537	0.278898
3.2083	0.020073			5.03834		3.2083	4.07212
3.90993	2.01611			0.2125		3.90993	0.45712
3.02175	2.00451			8.24568		3.02175	0.89254
1.85166	0.296689			1.17805		1.85166	8.86379
2.83182	1.12705			3.67795		2.83182	0.693569
9.42721	3.4601			0.082607		9.42721	1.27993
3.54058	0.166447			1.38556		3.54058	0.296987
3.64265	4.32583			1.41873		3.64265	1.94023
3.06543	0.305715			5.29905		3.06543	1.37838
2.44217	2.73841			1.14694		2.44217	0.32551
3.92361	5.25449			3.32977		3.92361	2.94822
2.18233	2.48472			2.82257		2.18233	2.41818
2.15935	3.38164			3.26533		2.15935	8.23743
3.90413	2.61055			0.884825		3.90413	0.43707
1.35428	5.76723			3.21984		1.35428	2.59432
0.990232	1.27899			4.04104		0.990232	1.42399
2.49195	2.62268			0.327849		2.49195	2.6794
1.96519	4.30089			1.69868		1.96519	1.42502
0.065121	8.75148			2.58905		0.065121	3.28097
1.8808	4.70563			1.25318		1.8808	0.412611
3.00352	4.10678			0.991105		3.00352	4.48277
0.650993	3.06217			3.90647		0.650993	2.78492
4.11417	4.76635			1.81215		4.11417	3.68764
0.096081	1.00229			4.1463		0.096081	0.484232
0.132013	1.73787			0.119607		0.132013	1.8909
3.13213	4.52375			4.86469		3.13213	1.42378
6.40374	2.43853			2.08912		6.40374	1.81014
5.41454	3.49018			1.35661		5.41454	5.33341
3.77682	1.27328			1.13908		3.77682	1.30739
0.736015	0.334658			2.7352		0.736015	2.55162
2.53166	1.91232			2.81665		2.53166	3.46208
0.796359	0.992966			0.828493		0.796359	0.142051
5.94352	2.81575			0.281368		5.94352	0.596126
4.3978	1.92724			5.31858		4.3978	0.678361
3.87687	6.69883			2.30528		3.87687	2.99871
3.17096	3.30053			0.506603		3.17096	5.19156
2.76595	2.50569			0.092179		2.76595	0.21452
3.82977	3.2112			1.43742		3.82977	0.19368
2.69874	5.35884			3.03952		2.69874	1.34603
2.24293	0.11743			0.77093		2.24293	1.65208
1.19228	3.63955			1.77147		1.19228	0.654879
0.419502	2.00284			1.8783		0.419502	0.209825
3.97992	3.49553			7.26529		3.97992	3.16852
4.72973	4.04404			3.41772		4.72973	0.243792
4.07846	0.072321			0.718462		4.07846	1.49941
5.62964	1.95684			2.15785		5.62964	0.252493
4.05976	2.95367			0.099306		4.05976	0.915524
0.699529	3.29601			0.735298		0.699529	0.719872
1.97938	3.45671			1.60749		1.97938	0.548006
3.00017	1.74607			4.16312		3.00017	1.82881
1.13707	2.46339			7.38736		1.13707	0.824987
0.68998	0.119091			0.613466		0.68998	0.32105
0.557541	4.9932			2.54579		0.557541	0.537805
8.65061	1.85161			5.17108		8.65061	0.839301
5.06427	4.57569			2.28623		5.06427	0.017794
1.54412	3.57671			0.971686		1.54412	0.773184
2.92981	1.24826			3.78521		2.92981	0.086898
3.86784	0.829985			1.63641		3.86784	0.059276
0.196451	3.56939			6.67824		0.196451	5.47616
5.27886	2.38914			0.154012		5.27886	0.414677
4.51061	0.773325			0.640184		4.51061	3.61627
6.414	4.85225			0.204799		6.414	0.118822
5.90903	1.46339			1.78044		5.90903	0.848472
2.91619	5.22529			0.273801		2.91619	0.581885
3.60157	2.49543			5.78366		3.60157	4.77928
4.176	0.377032			1.80816		4.176	0.349021
1.54459	7.29399			0.683318		1.54459	0.665952
2.2342	2.46487			3.89084		2.2342	0.306827
3.33289	0.60586			1.79627		3.33289	0.145723
4.02185	3.92427			4.66264		4.02185	1.8079
2.24135	4.67832			5.1323		2.24135	1.75017
1.45711	3.38602			0.201438		1.45711	2.69831
0.713303	2.23165			1.2728		0.713303	0.245597
3.87912	3.26134			0.52549		3.87912	3.28718
1.75683	1.01744			3.21029		1.75683	2.58679
5.61231	4.49742			3.30531		5.61231	0.290371
2.54221	4.31589			1.75266		2.54221	6.43305
2.18407	0.049894			0.109358		2.18407	5.36377
1.68818	2.67324			0.340068		1.68818	2.03396
7.78882	0.017969			0.175462		7.78882	0.095926
0.335763	2.01773			0.125516		0.335763	1.48376
2.31759	6.24142			0.209951		2.31759	2.44991
3.10638	4.85216					3.10638	0.196374
2.62798	7.11963					2.62798	3.53249
3.05878	0.290494					3.05878	0.115995
0.97194	2.48139					0.97194	3.67441
2.12111	2.17693					2.12111	1.68657
1.47246	3.09413					1.47246	1.22591
2.45836	6.69822					2.45836	3.37767
3.0739	0.620841					3.0739	0.446734
3.09728	0.169906					3.09728	1.63948
0.428741	3.21119					0.428741	4.3732
1.17055	2.01745					1.17055	1.75791
5.88219	2.77379					5.88219	3.2521
3.19518	1.63851					3.19518	2.71046
4.50302	3.20212					4.50302	3.24616
2.43073	0.313572					2.43073	0.40329
0.438159	5.6118					0.438159	0.93664
0.061885	0.182959					0.061885	0.231501
0.756233	2.25621					0.756233	1.85244
0.11801	3.81795					0.11801	0.949253
2.39186	2.27804					2.39186	0.910986
2.75257	8.63283					2.75257	2.19486
1.29208	4.99467					1.29208	0.241383
5.24175	0.759341					5.24175	3.61484
1.8291	2.81889					1.8291	2.18266
3.53845	7.18894					3.53845	0.328888
4.51639	10.8247					4.51639	1.2343
1.60818	0.921544					1.60818	3.59528
3.47589	4.17194					3.47589	0.042031
5.38879	4.19906					5.38879	5.51286
4.76201	4.33763					4.76201	0.154005
0.428572	6.85896					0.428572	2.56809
0.390139	5.07411					0.390139	0.093251
3.05008	2.22718					3.05008	2.68376
6.23036	0.476255					6.23036	0.573198
4.67404	2.12761					4.67404	0.504913
3.87504	2.58472					3.87504	0.432898
0.792212	0.537481					0.792212	0.755617
2.41828	4.9933					2.41828	0.168452
1.50078	2.45126					1.50078	5.74442
4.33002	6.6806					4.33002	3.16602
2.94313	0.089543					2.94313	7.69522
0.269514	5.38934					0.269514	0.667533
0.081121	4.21384					0.081121	0.528148
4.1012	3.26807					4.1012	0.15838
4.03502	0.143685					4.03502	0.737547
1.51531	1.55165					1.51531	1.60675
0.691896	1.79971					0.691896	1.89773
2.21313	8.87876					2.21313	2.66809
4.34054	5.09333					4.34054	3.85163
2.68465	1.05862					2.68465	2.20632
2.39832	0.043776					2.39832	3.19103
0.128091	2.38223					0.128091	1.47818
2.98142	1.89451					2.98142	3.87085
4.11598	3.47259					4.11598	5.79818
1.48267	4.03507					1.48267	2.51888
0.1123	2.19809					0.1123	0.177702
3.37774	2.95813					3.37774	1.7055
2.44537	1.45974					2.44537	0.734303
0.75485	0.357555					0.75485	0.437202
5.27149	3.21247					5.27149	1.07501
4.57873	2.08768					4.57873	0.713559
0.630193	4.62568					0.630193	0.457154
5.14916	4.28675					5.14916	3.41698
0.46475	1.61447					0.46475	1.74266
0.949773	0.084315					0.949773	0.507369
4.77166	6.29995					4.77166	1.52531
4.52625	5.02327					4.52625	2.64961
0.642114	5.88377					0.642114	0.739535
4.44615	2.84455					4.44615	4.05476
5.33269	0.23809					5.33269	0.661564
4.10303	4.08694					4.10303	0.404111
3.75484	5.52443					3.75484	2.77445
2.54881	0.593503					2.54881	3.37414
2.0963	3.43197					2.0963	0.078494
1.19475	4.2783					1.19475	0.068685
3.37669	1.88102					3.37669	0.302388
0.208778	4.9443					0.208778	0.624388
1.6397	0.038579					1.6397	1.75503
6.91767	4.62237					6.91767	0.151267
4.21561	4.37248					4.21561	1.56257
0.349414	1.84001					0.349414	0.512288
0.993379	6.11422					0.993379	0.618539
6.84072	3.66041					6.84072	1.64787
1.7673	4.45267					1.7673	6.15957
3.35531	4.44954					3.35531	5.78726
2.81848	3.89424					2.81848	3.22975
3.28002	2.78258					3.28002	0.172349
4.52912	0.232782					4.52912	3.41338
4.59825	5.17599					4.59825	0.148037
2.23635	3.12867					2.23635	3.01728
0.996472	6.25797					0.996472	3.10218
0.184207	3.51516					0.184207	0.492026
1.73629	2.72517					1.73629	1.42754
1.84422	0.747798					1.84422	0.289998
1.6345	3.97256					1.6345	0.350502
0.897073	6.08223					0.897073	0.129961
2.67857	0.817721					2.67857	0.072822
1.99535	5.08747					1.99535	0.090837
0.037226	8.07211					0.037226	3.56324
3.11902	2.96156					3.11902	4.02979
1.00835	4.36833					1.00835	3.97777
4.21144	1.26003					4.21144	1.44711
3.41243	4.81434					3.41243	0.710996
5.80205	4.08082					5.80205	2.83845
1.98409	3.85892					1.98409	4.2224
4.35022	1.51711					4.35022	2.05403
2.17122	2.75671					2.17122	0.094668
0.17661	1.85718					0.17661	1.55344
0.564091	0.244795					0.564091	0.384849
3.72404	3.16009					3.72404	3.26686
4.79292	0.852514					4.79292	0.261077
0.395525	2.45056					0.395525	6.15546
0.463627	2.52976					0.463627	1.71149
2.0672	0.317501					2.0672	2.61181
2.9848	0.026688					2.9848	1.52913
1.40751	2.2183					1.40751	0.169356
3.53548	3.60483					3.53548	0.346127
0.688615	4.11432					0.688615	2.6418
4.2131	3.82009					4.2131	3.63097
5.74035	2.86535					5.74035	1.1459
0.198453	6.42609					0.198453	0.279812
2.2753	0.041134					2.2753	0.826555
3.53225	2.13425					3.53225	0.12422
4.81611	6.54758					4.81611	2.98164
1.11505	1.3264					1.11505	0.521467
1.95199	0.632092					1.95199	2.24509
4.73659	0.959694					4.73659	0.949486
3.23302	2.90269					3.23302	7.21664
3.26535	3.4632					3.26535	2.06863
5.93659	0.119805					5.93659	2.57783
3.49032	5.7617					3.49032	4.78656
3.31616	0.300265					3.31616	4.90966
2.3317	0.283879					2.3317	3.34196
2.60283	6.28098					2.60283	2.76614
1.59067	0.828486					1.59067	8.12147
6.35985	4.94428					6.35985	1.90466
5.09779	2.47615					5.09779	0.066814
3.58541	1.82312					3.58541	0.846303
0.773589	0.558769					0.773589	0.98611
2.35708	2.9769					2.35708	0.743895
7.26388	3.56622					7.26388	1.37577
5.15349	3.23407					5.15349	2.20833
0.32609	4.44257					0.32609	0.15609
3.10784	2.07234					3.10784	2.61549
0.156875	0.053866					0.156875	0.05904
3.93347	1.20552					3.93347	2.16923
0.059243	1.66203					0.059243	0.169477
1.1362	1.24105					1.1362	3.69356
7.56114	3.55972					7.56114	0.921514
5.13774	3.28581					5.13774	2.86588
2.9297	5.71274					2.9297	0.6697
0.74943	3.61579					0.74943	1.09452
0.983608	3.80133					0.983608	0.434819
1.09522	5.56989					1.09522	0.07981
6.15123	0.125499					6.15123	1.99592
3.89565	4.39823					3.89565	1.2063
3.94645	0.115754					3.94645	1.53629
0.772972	0.675057					0.772972	3.69278
3.51005	2.22584					3.51005	2.04434
4.24779	0.215607					4.24779	4.24041
0.491132	6.62944					0.491132	1.77246
2.71445	0.227697					2.71445	2.85427
0.988394	2.02027					0.988394	2.03256
0.096115	1.22995					0.096115	3.06243
1.91289	0.401695					1.91289	3.38856
0.511993	2.31397					0.511993	0.047545
4.02946	3.32539					4.02946	0.184805
2.52751	1.48137					2.52751	0.298087
2.20273	0.037541					2.20273	4.92309
0.353573	2.52336					0.353573	1.34587
1.0084	3.36933					1.0084	3.86152
1.01378	4.14908					1.01378	2.74358
0.154224	0.577987					0.154224	1.19756
1.23901	6.10368					1.23901	2.40452
2.02701	4.32681					2.02701	4.48404
0.030448	0.130694					0.030448	0.046492
2.7827	3.774					2.7827	2.72517
2.46396	1.86496					2.46396	0.314619
5.09644	0.472707					5.09644	3.50158
7.36649	0.720593					7.36649	3.69321
2.97075	0.626402					2.97075	0.112576
4.15495	0.861264					4.15495	1.93593
2.42184	3.1095					2.42184	1.55501
0.694075	2.37019					0.694075	1.2299
5.14206	0.80455					5.14206	0.897814
0.654766	6.1311					0.654766	3.18695
3.583	3.12903					3.583	4.46586
5.79558	3.39916					5.79558	1.372
0.475894	3.90546					0.475894	4.29423
3.63395	2.61903					3.63395	1.0207
3.13178	3.56875					3.13178	0.86804
8.11546	2.97821					8.11546	1.13555
0.328059	0.320145					0.328059	1.77922
2.37264	3.91365					2.37264	0.064643
0.031374	0.764568					0.031374	2.50888
1.00245	2.71746					1.00245	1.34352
0.407885	0.102121					0.407885	4.94706
0.492554	5.67356					0.492554	2.68757
0.144215	2.75796					0.144215	5.92654
5.36564	4.69186					5.36564	1.3765
5.57	3.84317					5.57	3.49681
2.9227	0.316775					2.9227	0.514045
3.95026	5.36238					3.95026	0.656041
0.799426	4.52943					0.799426	4.29874
1.61258	3.63211					1.61258	4.70404
3.7814	0.536324					3.7814	1.79916
5.1934	3.6354					5.1934	0.766949
2.83615	3.19342					2.83615	1.48283
6.43453	3.63501					6.43453	1.21043
4.37389	2.7347					4.37389	0.23485
0.132833	0.256063					0.132833	0.192689
2.75853	6.60108					2.75853	1.28698
6.96253	2.30531					6.96253	2.15389
3.00469	3.3361					3.00469	0.345484
5.03498	0.794507					5.03498	0.869187
2.04501	3.97238					2.04501	3.26038
2.85015	1.09145					2.85015	0.424493
3.9291	2.51621					3.9291	2.20768
4.96113	3.44399					4.96113	0.914059
0.16646	5.44625					0.16646	2.36661
3.25657	1.26384					3.25657	0.310783
3.89317	3.63582					3.89317	0.319108
4.32146	0.420524					4.32146	0.329524
3.5442	0.065212					3.5442	0.934865
2.25991	2.48684					2.25991	0.308719
2.17865	3.41781					2.17865	0.263409
2.88005	3.75988					2.88005	0.298381
1.77903	3.92009					1.77903	2.10897
3.5524	4.06162					3.5524	0.495007
8.81525	2.93735					8.81525	0.768527
4.7435	3.70089					4.7435	3.30871
1.7703	3.28748					1.7703	2.85942
3.08998	5.56502					3.08998	1.51268
0.2867	0.18707					0.2867	2.52635
4.31531	2.86121					4.31531	1.01018
3.07625	4.66188					3.07625	0.430961
2.63331	3.9425					2.63331	1.15322
5.57012	3.29609					5.57012	0.399682
3.20417	3.01377					3.20417	0.928026
3.05398	2.77242					3.05398	3.39617
0.804664	0.320917					0.804664	0.365266
4.04026	3.4185					4.04026	0.613051
0.172816	3.37787					0.172816	0.114947
5.46051	2.29107					5.46051	4.82664
0.628434	4.09138					0.628434	0.404062
2.76713	4.69698					2.76713	4.14392
6.93461	2.41017					6.93461	3.46924
3.63533	1.06325					3.63533	2.94461
0.16279	2.78084					0.16279	7.87678
3.62411	2.15291					3.62411	0.566367
2.77962	1.82086					2.77962	1.82037
1.0123	1.68045					1.0123	3.51159
4.46575	4.09483					4.46575	0.698401
2.0883	4.95229					2.0883	0.061808
1.90387	4.8395					1.90387	6.99603
4.0238	2.34622					4.0238	0.703879
0.629051	3.28957					0.629051	1.5342
5.01411	6.31715					5.01411	3.10804
0.334935	0.438517					0.334935	6.04199
1.74948	6.5792					1.74948	1.99839
0.838544	1.39483					0.838544	3.92048
6.73395	0.275793					6.73395	2.11914
2.06937	0.604491					2.06937	4.57501
3.64326	4.09274					3.64326	0.555253
5.0842	5.99785					5.0842	6.14072
6.36114	4.20864					6.36114	3.09869
0.204623	1.11796					0.204623	0.333228
4.76028	1.44517					4.76028	2.80274
5.58379	3.02713					5.58379	1.66325
2.76181	0.278706					2.76181	1.44017
2.72502	0.887738					2.72502	1.21718
2.87624	4.19524					2.87624	0.742067
0.097171	1.848					0.097171	1.91026
1.94476	0.09218					1.94476	0.715256
3.68455	4.33917					3.68455	0.101179
3.30689	1.61745					3.30689	0.967549
0.939839	8.18572					0.939839	0.075663
1.13999	3.35459					1.13999	0.31497
3.8107	1.01299					3.8107	1.88102
3.28757	0.234803					3.28757	0.046262
3.28135	0.108916					3.28135	1.05878
0.079519	3.85893					0.079519	2.00118
0.334215	3.67993					0.334215	0.368061
4.58998	1.32058					4.58998	1.15706
4.07358	0.996689					4.07358	1.3819
5.46545	3.79722					5.46545	1.58971
0.626835	3.27048					0.626835	0.464001
0.651102	1.34926					0.651102	0.310643
0.913943	3.89443					0.913943	0.942031
0.119112	5.27837					0.119112	2.49362
4.41411	1.3456					4.41411	2.13006
0.220061	3.06354					0.220061	2.15536
1.96686	7.39957					1.96686	0.07486
2.79556	2.32228					2.79556	3.38631
0.119067	1.07513					0.119067	3.04931
0.18014	6.07716					0.18014	2.02665
5.34263	2.22232					5.34263	1.24163
2.8655	3.68146					2.8655	2.36368
2.39929	0.061637					2.39929	0.07479
1.49163	1.7223					1.49163	1.01588
3.76882	1.67508					3.76882	2.59774
5.72989	4.18404					5.72989	0.3063
0.346611	4.74005					0.346611	4.16574
1.00407	3.41745					1.00407	0.60964
0.17716	4.11524					0.17716	4.91302
3.24586	3.0106					3.24586	1.29286
3.43425	2.18548					3.43425	2.91816
4.13475	2.65404					4.13475	0.375041
3.46358	3.63798					3.46358	3.89005
1.99664	6.79791					1.99664	1.53818
2.20171	4.42151					2.20171	2.91135
1.31237	0.115056					1.31237	0.439176
1.56428	4.17553					1.56428	3.55197
0.573294	0.717079					0.573294	2.80861
4.98988	3.65539					4.98988	1.70446
0.191104	1.39003					0.191104	1.55499
0.361265	0.844679					0.361265	1.45151
0.847674	0.147664					0.847674	1.18953
1.02555	2.72632					1.02555	0.414762
4.32416	2.93599					4.32416	0.441079
4.28432	4.96812					4.28432	4.44249
2.68734	3.77716					2.68734	3.18472
2.78537	2.78859					2.78537	0.427235
4.02458	4.55305					4.02458	1.31886
2.26493	0.590911					2.26493	0.966303
0.973475	0.826072					0.973475	3.48236
3.07999	0.694245					3.07999	1.90987
0.095997	3.55153					0.095997	0.06712
0.7891	5.42245					0.7891	3.9012
4.93671	3.16629					4.93671	1.64147
0.211658	4.25066					0.211658	0.06497
5.0738	2.64612					5.0738	1.59101
0.214674	0.445984					0.214674	0.732511
0.185773	3.85896					0.185773	0.584899
3.54166	3.72718					3.54166	0.143325
2.29824	4.7484					2.29824	1.71168
2.59094	6.06926					2.59094	0.824278
4.31307	1.30073					4.31307	0.220721
4.13779	0.30012					4.13779	6.19591
3.93519	2.48031					3.93519	0.205998
0.580768	4.23774					0.580768	0.962217
0.052477	3.73443					0.052477	1.56769
3.82966	3.34569					3.82966	1.91908
3.4725	1.26743					3.4725	2.33235
0.102787	2.55249					0.102787	1.20147
3.26356	0.238542					3.26356	2.08017
4.49222	3.2707					4.49222	0.355584
5.73796	4.45791					5.73796	1.9974
4.30393	3.71244					4.30393	0.365803
2.32215	0.598697					2.32215	0.361804
2.41129	7.72044					2.41129	0.087616
2.28012	0.379919					2.28012	0.71258
0.36655	6.70727					0.36655	0.130392
5.52951	7.44109					5.52951	1.13142
3.66185	4.27038					3.66185	1.93887
1.54971	0.917598					1.54971	0.417856
2.17385	4.48992					2.17385	0.978399
1.33586	1.46419					1.33586	1.06948
0.120367	4.24826					0.120367	0.601527
0.912521	3.20684					0.912521	1.54045
3.85809	5.68113					3.85809	3.02955
6.11513	2.17967					6.11513	1.18015
3.9392	2.33726					3.9392	1.94193
2.00921	1.41049					2.00921	1.95871
1.8052	2.26032					1.8052	1.56117
0.447079	1.02847					0.447079	0.221215
3.09209	3.1179					3.09209	3.41853
0.527276	4.58993					0.527276	4.6756
1.24466	3.30087					1.24466	1.03132
2.09621	3.07567					2.09621	8.1273
0.193714	3.87636					0.193714	3.31927
2.23018	4.86458					2.23018	0.62999
2.05783	7.97368					2.05783	0.063072
3.87524	0.061917					3.87524	3.00128
2.82204	3.60566					2.82204	0.713514
3.25875	0.019207					3.25875	0.448637
4.07486	4.53606					4.07486	3.24896
4.24474	3.20969					4.24474	0.71552
8.33167	4.74766					8.33167	0.48968
5.51849	7.14274					5.51849	2.1283
0.487749	2.09591					0.487749	0.170458
5.15188	3.51372					5.15188	1.3187
1.63353	5.38098					1.63353	1.00936
5.90682	0.762459					5.90682	0.177015
0.228015	3.84048					0.228015	1.15374
3.15043	7.14391					3.15043	2.1667
6.51547	7.03949					6.51547	3.6282
3.90528	2.87751					3.90528	1.51365
7.83349	2.93169					7.83349	1.75091
3.33829	3.7678					3.33829	0.498726
4.83717	2.39353					4.83717	1.03244
3.89064	0.148214					3.89064	1.88673
3.79484	0.577901					3.79484	1.99764
3.11492	0.049947					3.11492	2.26092
2.40137	0.665816					2.40137	1.67407
7.82991	2.60295					7.82991	2.80115
4.68252	4.2292					4.68252	4.47848
2.85925	1.89506					2.85925	3.5954
1.94408	3.39741					1.94408	0.108673
4.13758	2.04365					4.13758	0.682847
6.61068	3.46877					6.61068	1.19772
0.472013	0.055827					0.472013	1.02669
2.05948	3.47943					2.05948	6.30423
3.94169	1.51369					3.94169	2.54305
6.45278	3.15911					6.45278	1.49896
5.34553	5.01424					5.34553	2.44672
0.688792	1.57499					0.688792	0.123747
0.610198	2.53254					0.610198	1.01733
5.94729	4.74454					5.94729	3.01905
3.95932	0.481052					3.95932	3.68013
0.439586	0.83196					0.439586	0.108904
3.42411	3.59011					3.42411	9.12334
6.84948	0.314318					6.84948	0.787483
0.898284	1.50518					0.898284	6.28406
0.432471	4.61556					0.432471	2.10067
3.69846	2.13256					3.69846	1.06538
0.113694	1.49313					0.113694	3.62581
0.072865	0.071818					0.072865	1.9316
0.366801	4.5603					0.366801	0.315485
1.71413	0.50047					1.71413	1.72644
3.95503	0.285283					3.95503	0.172338
4.40663	8.26866					4.40663	3.5113
1.78948	4.1479					1.78948	0.69035
1.38406	3.23593					1.38406	1.50539
3.14219	4.44161					3.14219	0.023719
5.10999	3.20186					5.10999	3.3139
0.672303	2.59407					0.672303	0.177256
0.077052	5.01602					0.077052	4.81433
1.59528	1.72597					1.59528	1.34933
4.42544	5.07107					4.42544	4.07418
0.350643	0.132527					0.350643	2.41227
4.01502	5.29376					4.01502	7.07572
2.5071	4.04452					2.5071	0.951769
1.16813	1.13861					1.16813	3.18021
5.32792	0.701121					5.32792	3.29691
0.292998	0.590665					0.292998	1.89424
4.98508	0.219437					4.98508	1.65516
2.71543	2.72161					2.71543	0.049259
2.5224	3.82548					2.5224	0.032235
1.68298	3.13022					1.68298	0.404945
3.9306	2.46347					3.9306	0.883334
2.393	3.58048					2.393	2.16447
2.17943	5.4225					2.17943	0.903641
3.16504	0.031124					3.16504	0.279993
0.070352	1.74591					0.070352	0.202448
2.70053	3.97757					2.70053	4.69947
5.1569	3.69017					5.1569	2.23916
3.30734	3.19367					3.30734	0.461934
4.9373	0.847048					4.9373	0.311517
1.69027	2.58861					1.69027	2.85719
3.44601	5.26207					3.44601	0.067526
5.88167	5.16637					5.88167	3.46856
4.55695	4.80442					4.55695	0.219094
0.285828	0.172036					0.285828	3.78852
2.83876	3.06987					2.83876	3.13565
2.85165	3.9193					2.85165	5.17226
0.085181	1.60336					0.085181	0.470238
3.05958	0.758835					3.05958	2.33424
7.19061	1.01083					7.19061	5.3056
7.77206	3.03244					7.77206	1.51815
3.62966	4.05708					3.62966	0.060464
3.02201	2.11863					3.02201	2.26251
4.0492	0.097879					4.0492	3.05441
2.96753	4.31171					2.96753	1.43003
4.01671	3.06693					4.01671	2.17455
2.25381	3.6029					2.25381	2.3893
3.78789	3.49797					3.78789	0.541243
0.425693	2.88132					0.425693	0.167223
3.50386	0.837663					3.50386	0.353106
6.22936	0.200773					6.22936	1.28733
2.91742	0.473782					2.91742	0.998459
4.1304	3.78179					4.1304	1.23721
0.718724	0.190861					0.718724	4.03417
2.86416	4.081					2.86416	0.79345
2.37338	1.06451					2.37338	0.07588
4.30335	0.261691					4.30335	4.74609
0.484939	2.90428					0.484939	5.20927
6.40663	2.55903					6.40663	0.748531
5.24076	3.53451					5.24076	4.50471
0.644796	2.27742					0.644796	2.97728
0.736939	4.17683					0.736939	3.39033
3.11239	5.08709					3.11239	0.539488
3.37992	4.78226					3.37992	1.12382
0.181005	2.98138					0.181005	2.30552
2.00073	1.83694					2.00073	3.98175
0.197263	4.20285					0.197263	4.29684
1.19111	5.20721					1.19111	0.292852
0.207978	3.82464					0.207978	4.02468
2.6815	2.06383					2.6815	0.522458
2.06635	3.10057					2.06635	1.93587
2.09073	3.79069					2.09073	0.09807
2.72591	0.665215					2.72591	3.33074
0.085992	4.46882					0.085992	0.054942
5.16282	3.08592					5.16282	3.63985
0.410294	4.32196					0.410294	2.85456
4.8957	6.61604					4.8957	3.42727
7.00835	5.30595					7.00835	0.277028
6.10055	4.70363					6.10055	1.03995
6.8427	4.1188					6.8427	3.27137
3.0368	0.020627					3.0368	4.10659
2.8134	3.86516					2.8134	0.325771
6.84043	3.57588					6.84043	6.74954
4.70095	0.551771					4.70095	0.986053
3.99173	2.49752					3.99173	4.70294
3.70715	0.569433					3.70715	1.08226
2.52273	1.03122					2.52273	0.961398
4.79539	4.55555					4.79539	10.3443
4.68889	2.66055					4.68889	1.01692
6.6897	5.96496					6.6897	2.63481
7.23883	3.27928					7.23883	0.71004
2.16106	1.34607					2.16106	0.436184
4.69244	3.5805					4.69244	3.87539
2.45471	0.566994					2.45471	2.7542
0.452464	1.12078					0.452464	0.663965
3.22111	0.353767					3.22111	1.86621
1.81145	1.09407					1.81145	4.26686
1.30287	3.69015					1.30287	1.04954
5.69111	0.908768					5.69111	1.23101
2.45491	1.23468					2.45491	3.12257
4.57588	2.5223					4.57588	2.25751
6.41745	1.65973					6.41745	0.554926
4.6842	1.87045					4.6842	1.05493
4.93634	2.02842					4.93634	1.54518
6.59947	5.57974					6.59947	2.6333
2.92491	2.39998					2.92491	0.053453
2.76999	5.22791					2.76999	0.154247
4.05531	1.12822					4.05531	3.00333
1.52332	5.72825					1.52332	0.099827
4.47315	6.71573					4.47315	0.129875
1.30411	3.01948					1.30411	0.735604
0.629519	4.12697					0.629519	2.25499
4.30251	0.779773					4.30251	2.62795
6.10431	0.295262					6.10431	0.348323
3.37266	1.84277					3.37266	1.21372
2.4958	2.21091					2.4958	1.47222
6.21243	0.460855					6.21243	0.744949
3.2941	12.2555					3.2941	5.12988
2.58151	6.524					2.58151	0.436135
3.25939	4.26318					3.25939	4.71915
1.1643	2.01126					1.1643	1.53974
0.507377	3.91445					0.507377	1.90425
6.08034	4.98959					6.08034	3.00399
2.38152	2.39057					2.38152	4.09186
2.29844	3.22611					2.29844	0.985306
1.74907	5.30516					1.74907	3.5059
4.2842	3.17403					4.2842	1.87219
2.23529	5.66743					2.23529	1.00762
0.037464	5.94587					0.037464	2.3831
2.07675	5.61634					2.07675	2.90565
0.362564	4.81273					0.362564	3.35313
1.89268	3.20676					1.89268	2.08398
5.075	3.8178					5.075	0.189014
2.86822	4.97871					2.86822	4.33492
1.37581	2.38862					1.37581	4.18383
3.1141	0.029403					3.1141	4.60032
1.9572	2.08238					1.9572	1.58428
0.149885	2.9259					0.149885	2.47387
3.73687	4.41792					3.73687	0.320444
5.5274	0.039204					5.5274	3.57497
3.73118	2.84024					3.73118	0.726979
2.38864	2.98154					2.38864	0.60685
4.30755	4.73876					4.30755	5.38767
2.588	1.5355					2.588	3.80292
0.233916	3.91741					0.233916	7.3905
4.29774	0.757273					4.29774	0.212969
1.36081	2.53275					1.36081	1.88463
0.13277	1.49979					0.13277	1.32547
2.35139	4.99247					2.35139	2.67159
4.129	5.78551					4.129	2.48015
4.94228	4.06193					4.94228	0.028906
1.41157	4.86387					1.41157	8.02929
2.30724	1.88433					2.30724	4.11046
2.99898	3.12218					2.99898	1.74019
4.82212	4.61076					4.82212	1.04946
1.95735	2.809					1.95735	2.68946
3.67183	3.98123					3.67183	2.14688
3.46817	8.62067					3.46817	0.952986
6.23145	3.13197					6.23145	6.41096
2.86754	5.01072					2.86754	1.41963
2.439	3.69793					2.439	4.10584
2.8941	3.315					2.8941	1.06968
2.03374	2.09121					2.03374	3.57608
2.4868	5.15695					2.4868	0.971681
0.124482	3.28879					0.124482	1.67259
3.51493	0.08506					3.51493	0.750374
3.1343	0.250826					3.1343	2.24005
2.24831	0.181096					2.24831	1.05013
4.33003	5.59646					4.33003	2.33543
0.192127	2.64788					0.192127	3.99576
5.47127	0.360346					5.47127	3.01926
3.78975	2.83088					3.78975	0.57411
0.841677	1.52397					0.841677	0.166187
12.5329	0.066027					12.5329	3.78231
1.79052	0.125111					1.79052	2.78065
2.8778	0.803987					2.8778	1.22188
2.92369	4.20089					2.92369	0.113331
1.3216	4.10647					1.3216	1.51891
4.114	3.46673					4.114	0.548722
5.7127	0.031781					5.7127	1.02464
3.05922	3.4676					3.05922	2.75983
1.28507	0.079742					1.28507	2.41114
2.39581	2.91209					2.39581	2.67141
0.89012	3.51383					0.89012	0.108769
5.09506	3.39171					5.09506	3.11129
5.30275	5.93882					5.30275	5.653
2.39167	2.99593					2.39167	4.87271
8.06269	2.86784					8.06269	1.93394
4.40972	4.28883					4.40972	0.47099
0.73783	3.18064					0.73783	1.31042
6.48749	0.815034					6.48749	4.8486
0.185074	1.43621					0.185074	0.792385
1.98006	5.80122					1.98006	0.447349
6.26763	2.86696					6.26763	0.11953
2.52648	4.11912					2.52648	0.080501
0.382818	2.46201					0.382818	1.37613
0.498596	2.35506					0.498596	2.74341
3.08291	3.7337					3.08291	4.86135
7.84537	2.05576					7.84537	4.25828
8.12862	4.52013					8.12862	0.552163
1.46834	2.92853					1.46834	3.5328
2.34579	1.40795					2.34579	1.62462
3.14795	0.098447					3.14795	4.98605
0.396965	5.93758					0.396965	0.367701
3.13116	6.98659					3.13116	0.684903
0.22037	3.54398					0.22037	1.71314
0.545701	2.27991					0.545701	4.66012
3.39697	5.19839					3.39697	7.11327
6.24084	2.32472					6.24084	0.87343
0.077296	7.15291					0.077296	0.701899
3.65143	0.571492					3.65143	0.130052
4.78894	5.17623					4.78894	1.57793
3.31017	0.708748					3.31017	4.45569
5.66944	2.8776					5.66944	4.34475
2.66847	2.54323					2.66847	0.229531
2.74657	4.58748					2.74657	4.22618
4.34918	3.14589					4.34918	0.51161
3.12628	6.58662					3.12628	0.290706
3.54126	2.65931					3.54126	0.676082
3.62058	0.049774					3.62058	1.86987
6.73613	4.29938					6.73613	0.105005
2.9297	2.21754					2.9297	0.583707
0.734477	0.925992					0.734477	0.613004
4.34884	3.41108					4.34884	0.02509
3.22907	0.226087					3.22907	1.00572
0.117887	0.68275					0.117887	0.219473
1.7385	5.97276					1.7385	0.210884
0.999685	4.16829					0.999685	0.729454
3.12745	3.42662					3.12745	0.628265
0.230161	3.89758					0.230161	0.125802
4.78924	1.31339					4.78924	2.59848
2.34596	4.56659					2.34596	4.29656
7.20995	4.65297					7.20995	3.98231
3.05015	1.23329					3.05015	1.82916
3.77589	4.26521					3.77589	0.393996
2.84533	7.32898					2.84533	0.277058
1.74523	0.287228					1.74523	3.18777
0.278013	0.941915					0.278013	1.00047
2.05012	3.37264					2.05012	0.206607
0.524837	0.372199					0.524837	5.19049
1.68295	2.91846					1.68295	1.00745
1.37784	0.802155					1.37784	1.47954
2.55016	1.09214					2.55016	3.77435
3.85497	2.13803					3.85497	1.04686
3.05635	2.19237					3.05635	2.80411
3.88033	5.59755					3.88033	0.964198
1.31088	3.09389					1.31088	0.490266
0.014821	1.22601					0.014821	1.215
0.081637	0.936145					0.081637	0.677306
5.36674	4.53933					5.36674	2.65651
2.58073	0.137313					2.58073	4.07296
6.34784	0.127122					6.34784	4.85596
0.071967	1.85363					0.071967	0.331344
1.15373	2.82688					1.15373	4.26456
2.22648	2.52612					2.22648	0.34493
0.495277	5.22666					0.495277	0.903774
0.895694	3.93034					0.895694	0.381399
0.517671	2.44396					0.517671	0.398201
5.39035	0.030422					5.39035	1.10058
4.83478	3.22621					4.83478	1.92691
2.73373	2.4592					2.73373	0.359378
1.81252	1.59838					1.81252	1.00587
0.630757	0.086702					0.630757	4.61724
0.112535	1.05638					0.112535	1.55668
3.80116	0.716627					3.80116	0.338615
3.20314	6.73797					3.20314	5.08002
1.91566	3.83791					1.91566	1.33472
0.129559	4.07252					0.129559	0.028588
3.18949	3.48359					3.18949	1.44747
3.71242	5.16118					3.71242	3.28717
3.41637	5.94679					3.41637	2.19618
0.775723	4.49099					0.775723	0.70141
0.251762	5.66217					0.251762	2.99832
2.87225	0.092797					2.87225	2.77105
2.2513	6.24534					2.2513	3.03717
0.257067	3.67935					0.257067	8.92029
1.81898	2.81166					1.81898	1.01011
0.979839	1.91961					0.979839	4.38011
0.155548	0.62409					0.155548	4.03075
2.32771	1.6532					2.32771	0.325213
0.521052	2.47773					0.521052	2.65024
1.34337	2.27846					1.34337	2.21116
2.77653	3.34307					2.77653	2.77385
3.03972	3.79466					3.03972	0.707943
4.66258	2.39065					4.66258	3.74482
1.67024	2.99485					1.67024	0.156905
2.17408	4.77149					2.17408	0.118389
0.16512	1.57463					0.16512	2.13867
2.27608	3.39194					2.27608	3.33785
3.77964	3.96214					3.77964	2.36146
3.18405	1.71497					3.18405	1.24686
3.62637	0.118332					3.62637	1.79801
6.36955	1.2302					6.36955	1.16708
4.39332	1.34878					4.39332	1.33156
0.299372	0.993552					0.299372	4.90345
3.68313	2.84483					3.68313	1.01456
5.09188	3.25537					5.09188	1.17819
0.459569	6.61207					0.459569	1.23574
4.47082	3.39435					4.47082	4.91459
3.57335	1.5257					3.57335	5.60461
1.6531	4.89642					1.6531	1.63098
2.12732	1.76012					2.12732	1.17757
4.87742	4.44791					4.87742	2.16363
2.71361	3.73668					2.71361	1.44634
2.27166	5.31756					2.27166	3.13602
4.47031	4.95484					4.47031	0.391896
3.16037	1.90847					3.16037	3.51463
3.32811	2.14058					3.32811	5.25135
0.180663	1.8396					0.180663	1.7478
1.98723	3.74834					1.98723	0.347738
3.86473	5.99411					3.86473	3.58359
1.17877	8.02825					1.17877	3.4303
4.69764	0.969309					4.69764	0.901265
3.04973	4.36887					3.04973	4.2994
5.53217	0.338319					5.53217	1.08382
0.422083	5.79097					0.422083	0.634623
0.091509	0.234255					0.091509	0.113087
3.46149	2.55496					3.46149	0.469145
0.971897	0.097654					0.971897	6.23067
1.33903	1.98778					1.33903	5.87671
2.56029	1.24511					2.56029	1.4686
2.59276	0.873097					2.59276	1.03631
0.273085	2.47954					0.273085	5.09594
0.148173	1.50068					0.148173	2.14604
1.18147	4.41566					1.18147	0.382664
2.43745	0.410979					2.43745	1.61943
3.5202	5.02357					3.5202	0.696225
4.5968	5.46171					4.5968	0.951576
2.97432	2.51553					2.97432	5.40972
2.29188	1.7958					2.29188	3.01619
0.141369	0.372612					0.141369	3.29806
6.87832	4.57571					6.87832	0.600396
0.770632	5.19301					0.770632	4.04483
2.4301	2.92343					2.4301	5.25259
4.0755	1.87146					4.0755	3.25028
0.946428	1.06827					0.946428	0.172601
5.1769	0.820761					5.1769	1.43524
0.371259	1.40743					0.371259	1.14099
0.024927	2.35405					0.024927	3.58585
2.02333	4.61327					2.02333	1.69495
1.85852	0.256689					1.85852	5.04599
5.50053	5.28804					5.50053	5.03834
2.61286	0.112166					2.61286	0.2125
3.51099	3.60679					3.51099	8.24568
1.75191	6.70896					1.75191	1.17805
6.98034	4.58552					6.98034	3.67795
5.51267	4.66753					5.51267	0.082607
4.97295	2.33315					4.97295	1.38556
3.37376	2.24776					3.37376	1.41873
1.01928	2.94056					1.01928	5.29905
7.90224	3.54774					7.90224	1.14694
8.72649	6.06633					8.72649	3.32977
1.68696	2.50611					1.68696	2.82257
7.83499	3.48909					7.83499	3.26533
0.799223	5.28842					0.799223	0.884825
4.10372	5.94686					4.10372	3.21984
7.10164	1.69945					7.10164	4.04104
0.536374	0.380012					0.536374	0.327849
6.07581	3.86418					6.07581	1.69868
4.22568	0.401612					4.22568	2.58905
2.75031	0.931455					2.75031	1.25318
1.40946	4.6129					1.40946	0.991105
0.153167	3.38694					0.153167	3.90647
3.77038	1.10196					3.77038	1.81215
4.582	4.40668					4.582	4.1463
2.99018	0.264476					2.99018	0.119607
2.19602	5.22518					2.19602	4.86469
5.86058	1.73892					5.86058	2.08912
4.42918	0.736587					4.42918	1.35661
7.39205	4.73875					7.39205	1.13908
3.44646	3.08835					3.44646	2.7352
3.96299	1.1999					3.96299	2.81665
0.195635	0.046128					0.195635	0.828493
2.94441	6.98106					2.94441	0.281368
4.42078	5.43515					4.42078	5.31858
1.55998	0.028648					1.55998	2.30528
3.67697	3.55701					3.67697	0.506603
0.513078	5.20915					0.513078	0.092179
4.15211	3.92707					4.15211	1.43742
6.06507	1.72135					6.06507	3.03952
4.38827	2.8576					4.38827	0.77093
5.09878	0.05019					5.09878	1.77147
3.30458	3.03587					3.30458	1.8783
3.98463	5.55103					3.98463	7.26529
0.542909	3.09563					0.542909	3.41772
1.95071	2.40959					1.95071	0.718462
2.55122	2.86689					2.55122	2.15785
2.57212	0.070591					2.57212	0.099306
3.48385	3.5035					3.48385	0.735298
1.28121	5.66562					1.28121	1.60749
3.70193	0.041572					3.70193	4.16312
7.61646	0.21077					7.61646	7.38736
0.33174	0.785039					0.33174	0.613466
3.85683	5.83064					3.85683	2.54579
0.168691	2.72034					0.168691	5.17108
2.37078	0.102876					2.37078	2.28623
4.6918	3.52796					4.6918	0.971686
4.34942	0.240432					4.34942	3.78521
2.3171	5.72717					2.3171	1.63641
5.12712	5.57553					5.12712	6.67824
0.930637	4.93821					0.930637	0.154012
3.43836	5.55603					3.43836	0.640184
7.51729	3.97183					7.51729	0.204799
1.30377	0.103578					1.30377	1.78044
7.1461	1.56069					7.1461	0.273801
2.28427	10.7743					2.28427	5.78366
1.87596	2.7783					1.87596	1.80816
0.34595	6.0771					0.34595	0.683318
4.60283	0.279652					4.60283	3.89084
2.7153	3.32458					2.7153	1.79627
2.17011	0.901724					2.17011	4.66264
1.53454	0.195957					1.53454	5.1323
2.84141	2.92316					2.84141	0.201438
0.296313	1.91553					0.296313	1.2728
0.50746	3.22271					0.50746	0.52549
5.51532	5.45506					5.51532	3.21029
0.031111	0.303563					0.031111	3.30531
2.51316	7.93817					2.51316	1.75266
5.628	3.46935					5.628	0.109358
1.26223	2.36787					1.26223	0.340068
2.61729	3.42064					2.61729	0.175462
2.66976	4.00496					2.66976	0.125516
3.18217	4.84675					3.18217	0.209951
0.060913	3.46009					0.060913
0.045005	3.67037					0.045005
0.317698	3.49556					0.317698
5.00238	1.56478					5.00238
4.19463	1.64459					4.19463
2.8732	3.80714					2.8732
1.57521	1.56018					1.57521
3.25839	4.50593					3.25839
1.30275	6.02469					1.30275
3.67914	3.24107					3.67914
0.983821	2.56571					0.983821
0.060767	2.54697					0.060767
3.50441	0.195322					3.50441
3.02306	5.0046					3.02306
4.18867	1.0164					4.18867
0.082034	2.90474					0.082034
4.03795	3.01681					4.03795
3.09813	1.59758					3.09813
0.06036	0.149992					0.06036
3.38241	5.69085					3.38241
1.70076	3.55605					1.70076
0.175462	3.46956					0.175462
4.1335	0.122367					4.1335
0.096735	4.98224					0.096735
9.56648	3.23838					9.56648
3.40307	4.49071					3.40307
1.13134	0.280181					1.13134
0.631074	0.295613					0.631074
5.85827	0.751009					5.85827
7.09473	6.54379					7.09473
4.01373	4.4745					4.01373
2.51997	4.3313					2.51997
6.08508	1.59366					6.08508
1.19953	6.44545					1.19953
0.748038	4.9447					0.748038
0.345671	1.07841					0.345671
0.928921	5.13848					0.928921
1.47443	3.15705					1.47443
0.032214	4.39592					0.032214
3.46852	3.55418					3.46852
0.347734	4.75308					0.347734
3.16026	3.04507					3.16026
2.99117	5.3969					2.99117
2.75184	4.10327					2.75184
4.35206	4.48381					4.35206
6.73149	4.97025					6.73149
2.15989	2.43905					2.15989
0.110137	1.93276					0.110137
1.17085	2.97843					1.17085
0.731639	3.20409					0.731639
5.07446	3.95562					5.07446
1.24183	0.431635					1.24183
1.4871	3.78437					1.4871
0.244507	6.27336					0.244507
5.21406	3.22143					5.21406
4.22006	4.84706					4.22006
3.86685	0.37953					3.86685
1.64584	4.61994					1.64584
3.28742	2.12801					3.28742
3.89284	0.714351					3.89284
3.02949	0.484507					3.02949
4.47704	0.765957					4.47704
0.834836	0.912351					0.834836
1.41847	3.97299					1.41847
7.29403	3.27192					7.29403
0.275186	2.24137					0.275186
3.01242	4.21115					3.01242
5.97621	1.11065					5.97621
6.43166	3.85661					6.43166
0.087646	6.3654					0.087646
4.35819	0.386126					4.35819
3.61097	0.285891					3.61097
3.99158	3.16846					3.99158
3.27793	0.085023					3.27793
1.91861	1.7098					1.91861
1.48406	2.27769					1.48406
0.3628	7.9759					0.3628
4.45238	4.79234					4.45238
1.83528	5.27088					1.83528
3.86493	11.6606					3.86493
2.78299	1.69993					2.78299
2.71928	5.56811					2.71928
6.81974	1.13244					6.81974
3.1443	0.338848					3.1443
4.38063	4.57803					4.38063
1.27473	2.57673					1.27473
3.67094	5.71176					3.67094
0.534221	0.954746					0.534221
2.68093	0.15789					2.68093
4.12469	4.06561					4.12469
1.66578	0.17503					1.66578
4.03613	3.53802					4.03613
4.56532	0.20832					4.56532
4.02326	4.96805					4.02326
0.147864	11.569					0.147864
0.703012	3.94128					0.703012
0.330292	2.68375					0.330292
3.88174	1.62611					3.88174
2.64303	2.12359					2.64303
4.05532	2.27442					4.05532
4.85007	3.35453					4.85007
4.73179	4.8461					4.73179
0.120305	3.23604					0.120305
1.2724	0.360228					1.2724
2.07057	2.6365					2.07057
1.45394	4.53372					1.45394
1.88254	1.38946					1.88254
8.04691	1.72784					8.04691
[truncated: 6,156 more rows]

## Sheet: Fig3d-e
FPKM(WW)	A	G	FT	TT	-	+	FT	TT	Survival rate(%)	A	G	FT	TT	-	+	FT	TT
	5.90048	5.14906	0.291563	3.51273e-05	12.0043	3.11477	0.44879	0.000259529		7.8756	6.2082	0.0022076	0.000164281	2.0794	2.0794	0.00132757	0.00163998
	7.27574	12.8443			5.71748	7.66389				15.3617	6.2082			11.3839	2.0794
	7.07322	11.5304			4.46128	21.4424				55.04	36.08			6.2082	10.3597
	5.00073	9.91263			2.85705	5.09348				6.9092	14.5977			2.0794	15.375
	10.5258	11.4096			12.3972	15.206				14.8257	16.1476			8.9582	5.7595
	5.14743	21.4424			3.94554	14.7848				6.2082	51.07			2.0794	51.07
	7.39155	10.3071			3.49293	6.49672				23.63	25.27			43.21	2.0794
	3.61022	18.3426			3.59843	5.36996				2.0794	36.04			14.3559	9.4912
	5.89478	6.85028			7.82973	9.18702				2.0794	12.1054			61.45	3.6894
	17.5816	7.47783			3.66678	8.43294				2.0794	17.98			6.2082	7.3688
	10.8248	8.9858			5.02855	5.0474				33.68	12.3215			10.8429	9.3246
	6.30353	18.056			5.88153	6.4297				6.5875	23.06			10.158	2.0794
	4.41242	14.7848			9.31201	9.91263				14.6373	2.0794			9.584	32.82
	5.88153	8.83366			15.2187	5.78967				31.7	11.5786			32.91	22.75
	9.04771	6.6038			6.95148	9.79265				14.3963	54.27			6.9092	6.6049
	7.45622	7.03888			5.25546	7.59644				31.99	74.2			34.49	53.68
	6.42893	9.54002			10.5875	6.13684				49.72	65.65			3.5284	5.9614
	6.59885	11.1908			4.6115	15.5132				2.0794	16.2247			39.83	32.64
	5.57105	6.37642			1.57511	8.49418				42.33	13.3501			14.3963	18.8
	12.2704	5.31068			6.30353	8.52572				17.92	53.2			7.6336	5.9614
	6.84688	11.3084			5.41981	13.7126				27.24	24.02			6.9094	6.2082
	12.0043	6.49224			8.50412	9.10211				25.35	49.19			2.0794	3.8907
	13.4504	6.37867			11.357	4.61101				11.3839	49.98			32.78	12.7067
	2.02114	12.0732			3.74844	8.83366				16.5699	38.69			13.5507	14.5977
	9.31201	5.83413			7.56875	5.21541				19.33	33.24			2.0794	2.0794
	3.65502	18.0404			3.65502	15.4935				32.78	40.95			10.8025	6.2082
	6.37218	8.92482			5.57105	7.61034				12.7403	71.64			4.8572	2.0794
	5.2756	8.00396			4.26862	8.9858				13.6713	82.98			7.1107	22.01
	4.6115	9.20971			7.71398	9.20971				10.93	42.85			40.24	44.99
	1.57511	5.78967			10.5258	3.18048				40.24	2.0794			23.01	5.2992
	12.9249	11.071			5.5433	17.0287				23.01	21.86			6.2082	26.67
	4.41028	9.10211			7.35438	12.1396				21.17	48.77			9.8077	3.6893
	7.56875	7.31287			3.53585	10.7322				3.6894	44.26			2.0794	2.0794
	15.2187	17.0287			5.00073	11.1908				28.81	77.91			14.6373	2.5727
	5.47144	7.61034			20.2559	10.1811				13.5507	14.96			4.8572	33.88
	11.357	6.26384			7.97816	10.4976				14.8257	2.0794			17.89	5.2995
	8.50412	15.4935			3.11235	4.41028				8.5193	2.0794			7.6121	30.25
	3.11235	10.1811			7.27574	8.34535				7.6121	45.91			8.5193	48.77
	3.94554	6.48594			7.39155	8.90307				4.448	32.07			3.6893	6.3237
	2.85705	14.7117			1.76628	11.5304				61.45	25.22			13.7518	43.73
	16.9223	6.46659			12.9249	5.31068				43.21	34.28			2.0794	11.5786
	3.90944	7.3592			16.9223	15.7607				4.1495	63.47			28.81	44.87
	6.1681	8.43294			6.84688	11.071				25.75	32.04			2.0794	2.0794
	4.21546	13.7126			3.90944	6.85028				2.0794	5.9614			12.7403	14.96
	3.54694	4.59826			3.95796	7.51021				17.11	33.88			17.92	9.727
	4.53042	15.206			4.82611	9.54002				17.78	3.2869			5.2995	32.04
	7.87544	2.33918			6.59885	21.3071				5.2995	7.3688			35.49	12.3215
	10.3823	11.7109			5.36719	8.77868				49.65	56.54			21.6	42.85
	5.76998	21.3071			5.47144	6.37867				11.4175	31.96			2.0794	4.308
	12.3972	4.61101			5.40366	5.8271				11.7391	26.83			14.8257	3.6893
	7.27521	7.51021			3.90189	14.7117				14.3559	43.73			2.5727	4.1501
	5.40366	7.75601			10.8248	6.37218				4.9775	17.89			68.25	10.5723
	4.49817	5.8271			6.1681	5.83413				2.0794	17.23			2.0794	77.91
	9.34731	10.4976			19.3909	10.3071				18.18	17.64			32.99	54.69
	15.7607	8.52572			10.2021	9.23114				2.0794	32.55			12.3432	9.3246
	7.97816	5.23664			17.5816	11.3084				1.6538	2.5727			2.0794	16.2247
	1.76628	15.5132			7.45622	7.19245				28.32	34.05			6.9092	45.91
	6.61225	9.18702			7.27521	5.82382				15.1208	20.27			2.0794	32.55
	4.82611	9.99021			6.33007	5.14743				2.0794	26.67			28.32	15.3615
	3.90189	6.4297			4.41242	7.03888				28.04	53.68			3.5284	3.6894
	6.19168	15.0937			5.99056	7.21857				2.0794	5.2995			4.448	2.0794
	5.02855	15.4311			7.07322	8.21567				6.9094	4.9775			15.3617	9.5256
	12.0057	9.82769			12.2704	5.64912				26.46	18.8			2.0794	39.04
	5.47237	9.79265			12.0057	9.34731				3.5284	16.633			2.0794	5.2992
	3.59073	4.72423			6.13641	4.50115				5.702	14.8977			15.1208	52.6
	3.74844	10.3753			5.2999	4.59826				2.0794	2.0794			21.17	36.08
	5.70216	6.13684			7.87544	6.26384				13.7518	12.4865			4.1495	53.2
	3.49293	8.34535			4.21546	5.52527				10.158	44.99			25.35	10.6418
	7.82973	8.77868			5.89478	6.66495				32.91	39.04			25.75	1.6538
	10.5875	8.49418			10.3823	2.33918				4.8572	16.5691			2.0794	5.1383
	5.09052	4.80969			3.61022	9.86993				1.6538	2.0794			6.031	2.0794
	5.54079	9.23114			6.19168	6.48594				2.0794	21.88			6.2082	17.13
		11.5939			5.13879	8.17957					2.0794			2.0794	2.0794
		9.86993			3.54694	7.75601					10.1297			2.0794	21.86
					5.24333	5.14906								7.1108	4.0701
					6.33443	7.47783								28.04	12.1054
					2.02114	6.6038								42.33	17.89
					4.49817	9.99021								3.5284	65.65
					9.04771	12.0732								6.2082	26.83
					5.76998	5.94199								3.6893	6.4673
					5.90048	6.24356								29.19	16.5691
					4.73164	4.01867								5.2995	2.0794
					4.89202	4.80969								14.8257	15.1889
					5.2756	4.72423								6.6685	49.98
					15.0937	11.4096								2.1811	17.64
					4.93719	10.0752								42.02	25.22
					4.58991	18.056								6.3566	3.6893
					5.94502	7.3592								2.0794	13.6713
					6.61225	7.31287								6.9092	2.0794
					5.47237	6.40682								2.0794	7.3119
					5.54079	6.49224								8.5349	52.19
					6.42893	11.5939								2.0794	8.8421
						13.4504								6.2082	6.6453
						6.37642								8.0366	33.24
						8.92482								1.6538	25.27
						7.13645								6.5875	2.0794
						5.23664								2.0794	24.02
						15.4311								60.98	13.3496
						8.11951								2.0794	24.42
						18.0404								26.23	3.3966
						19.9049								33.68	2.0794
						18.3426								49.72	23.63
						11.7109								2.0794	74.2
						6.46659								3.0405	2.0794
						9.93916								2.0794	65.64
						15.0328								4.9775	6.6049
						7.12241								3.6893	16.0818
						9.82769								31.7	2.0794
														18.22	40.19
														5.2992	3.2869
														12.669	2.0794
														55.04	5.2992
														27.24	30.58
														5.702	4.4945
														8.5194	56.54
														9.6407	2.0794
														7.5133	10.1297
														14.0345	2.0794
														4.9775	32.07
														49.65	35.89
														17.11	7.1105
														2.0794	8.4465
														11.4175	17.23
														6.2082	6.2082
														2.0794	9.8419
														2.0794	17.98
														12.343	54.27
														6.9094	4.1501
														21.69	6.2082
														17.78	2.0794
														4.9775	4.9775
														2.5727	38.69
														6.2082	2.0794
														2.0794	1.6538
														25.02	2.5727
														17.78	20.27
														9.8073	13.5453
														3.6893	31.79
														5.2995	2.0794
														2.0794	21.88
														19.33	17.74
														6.9496	12.4865
														8.2784	16.1476
														3.7077	2.9931
														18.18	4.4014
														31.99	7.728
														11.7391	5.2993
														1.6538	61.85
														2.0794	23.06
														7.8756	9.164
														15.7251	63.47
														67.89	3.8907
														10.93	2.0794
														26.46	44.26
														16.633	5.3113
														8.1973	47.43
														2.0794	49.19
														3.8907	5.335
														8.5191	2.0794
														59.86	16.5699
														25.22	13.3501
														13.5458	71.64
														2.0794	21.48
														5.702	34.05
														2.0794	14.8977
														2.0794	5.2993
														7.9307	2.0794
														13.5505	27.12
														15.9257	40.95
														2.0794	41.76
														2.0794	36.04
														2.0794	31.96
														2.0794	34.28
														2.0794	6.2082
														4.9775	7.0476
														2.0794	41.41
															3.6893
															21.43
															2.0794
															2.0794
															13.752
															7.3699
															10.5723

## Sheet: Fig3g
Survival Rate(%)	WT	ZmABF4-OE#1	ZmABF4-OE#5
repeat1	16.6667	38.8889
repeat2	11.1111	66.6667
repeat3	27.7778	38.8889
repeat4	16.6667		38.8889
repeat5	50		66.6667
repeat6	5.55556		72.2222
	FT	0.849958	0.718421
	TT	0.0485286	0.0138584

## Sheet: Fig3h
Water Loss (100%)	WT			ZmABF4-OE#1			ZmABF4-OE#5
	repeat1	repeat2	repeat3	repeat1	repeat2	repeat3	repeat1	repeat2	FT	TT
0 min	0	0	0	0	0	0	0	0
10 min	6.44944	6.38378	5.7827	6.31682	5.99231	6.01889	4.17933	3.60502	0.165248	0.240288
20 min	11.2236	11.3209	10.4297	11.1919	10.4589	10.861	8.77371	7.67817	0.195588	0.240564
30 min	14.9791	15.6717	15.3227	14.0571	13.423	14.224	12.7986	12.0095	0.257697	0.0117107	*
40 min	17.9983	18.8502	18.0485	16.855	16.0494	17.0364	15.1392	13.8645	0.24118	0.0209341	*
50 min	19.7779	20.7594	19.5344	18.6633	17.7265	18.7854	16.9056	15.5838	0.402365	0.0249835	*
60 min	21.9318	23.1096	22.5913	20.4289	19.6308	20.7935	19.4151	18.0645	0.502067	0.00543283	**
70 min	23.1591	24.3197	23.2538	22.1333	21.2381	22.2024	20.5106	19.0532	0.411106	0.0212867	*
80 min	24.0243	25.2716	23.9163	23.3734	22.3445	23.2928	21.5144	19.8014	0.433854	0.0466403	*
90 min	25.4418	26.6107	25.6767	24.5159	23.6781	24.5884	23.3242	21.3851	0.386219	0.0256082	*

## Sheet: Fig4e-f
FPKM(WW)	S-9041		FT	TT	S-1425		FT	TT	survival rate(%)	S-9041		FT	TT	S-1425		FT	TT
	+	-	0.000103357	3.38475e-14	+	-	0.00618877	4.28647e-12		+	-	3.821e-07	4.6346e-06	+	-	0.00011383	0.000255938
	0.78335	6.6387			0.78335	6.6387				27.12	7.8756			27.12	7.8756
	1.2128	2.36132			1.2128	2.36132				15.3617	6.2082			15.3617	6.2082
	1.93734	2.19488			1.93734	2.19488				6.2082	17.78			6.2082	17.78
	3.59291	3.84923			1.74253	3.84923				6.2082	55.04			6.2082	6.2082
	1.74253	5.41659			1.16548	7.71931				6.9092	13.5453			6.9092	55.04
	1.16548	5.03011			1.04413	5.41659				6.2082	14.8257			6.2082	13.5453
	1.04413	5.98843			1.66417	3.59291				21.6	6.2082			6.2082	22.01
	1.66417	8.37128			1.34631	5.03011				6.2082	23.63			25.22	14.8257
	3.33106	6.12418			3.92899	5.98843				25.22	2.0794			6.2082	6.2082
	3.28567	5.68553			0.950354	9.92542				6.2082	5.2995			6.2082	21.6
	4.02111	8.82957			1.634	8.37128				6.2082	9.8077			2.0794	23.63
	1.34631	7.59422			3.04456	6.12418				2.0794	2.0794			2.0794	2.0794
	3.92899	3.49871			1.81239	5.68553				2.0794	2.0794			3.6893	5.2995
	0.950354	2.96237			1.49782	8.82957				3.6893	33.68			10.8025	9.8077
	1.634	7.85097			1.52497	7.59422				10.8025	6.5875			2.0794	2.0794
	3.24838	5.57955			2.23521	8.74464				2.0794	5.2992			3.7077	2.0794
	3.04456	5.324			2.72314	3.33106				3.7077	14.6373			2.0794	2.0794
	2.61134	4.32207			1.87199	3.49871				2.0794	32.99			5.702	33.68
	1.81239	10.7115			2.36177	3.28567				14.0345	13.5505			3.6893	6.5875
	1.49782	2.74068			1.04964	2.96237				14.5977	31.7			12.7067	5.2992
	1.52497	5.18563			1.75417	7.85097				5.702	2.0794			2.0794	14.6373
	2.23521	8.65863			5.50495	5.57955				3.6893	32.82			2.0794	32.99
	2.72314	8.32358			2.85496	5.324				12.3215	5.1383			34.49	13.5505
	1.87199	2.1792			1.95133	4.32207				2.0794	16.1476			44.26	31.7
	2.36177	4.43345			0.886639	10.7115				2.0794	9.3246			32.07	2.0794
	1.04964	4.058			0.742209	2.74068				34.49	7.9307			12.669	36.08
	3.14383	1.10861			1.444	5.18563				44.26	13.5458			32.04	14.0345
	1.75417	7.61461			1.75978	8.65863				2.0794	3.8907			3.2869	32.82
	5.50495	3.7262			7.09845	8.32358				32.07	14.3963			3.6893	14.5977
	2.85496	7.38765			0.989933	2.1792				12.7403	12.7067			8.9582	5.1383
	1.95133	2.52413			2.03132	4.43345				12.669	51.07			6.9094	16.1476
	0.886639	3.65309			2.88808	4.058				32.04	67.89			17.74	9.3246
	0.742209	8.66163			2.4853	1.10861				3.2869	8.5191			21.43	7.9307
	1.444	8.45368			16.4521	7.61461				3.6893	2.0794			4.9775	13.5458
	1.75978	7.34814			1.08502	4.02111				2.0794	5.2992			4.9775	3.8907
	0.989933	5.54053			1.80546	3.7262				8.9582	31.99			3.5284	14.3963
	2.03132	4.81853			5.3962	7.38765				6.9094	47.43			14.8257	51.07
	2.45878	5.38003			2.87162	2.52413				17.74	68.25			6.6685	67.89
	2.88808	11.6458			1.5235	3.65309				21.43	15.3615			10.3597	8.5191
	2.84929	8.14627			0.742269	8.66163				4.9775	25.27			16.633	2.0794
	2.4853	3.23063			1.73742	8.45368				4.9775	49.72			4.8572	5.2992
	16.4521	9.15689			1.09063	7.34814				3.5284	36.04			6.9496	31.99
	1.08502	2.63478			1.31673	5.54053				14.8257	3.8907			59.86	47.43
	1.80546	1.71834			1.39858	4.81853				6.6685	12.1054			2.0794	68.25
	5.3962	6.32696			0.9069	1.90802				10.3597	4.308			39.83	15.3615
	2.87162	9.6989			1.42162	5.38003				16.633	17.98			2.0794	25.27
	1.5235	5.69256			1.514	8.14627				4.8572	1.6538			14.8977	49.72
	0.742269	7.58338			2.89721	3.23063				6.9496	23.06			6.3237	36.04
	1.73742	3.29845				9.15689				59.86	42.33			26.23	3.8907
	1.09063	4.15364				2.63478				29.19	17.92			17.11	12.1054
	1.31673	6.49562				1.71834				2.0794	11.5786			7.1108	4.308
	1.39858	7.63303				6.32696				39.83	5.2992			17.78	17.98
	0.9069	3.74966				9.6989				2.0794	2.0794			2.5727	1.6538
	1.42162	8.42882				5.69256				14.8977	2.0794			2.0794	12.3215
	1.514	8.64206				3.94652				6.3237	54.27			49.65	23.06
	2.89721	1.88018				7.58338				26.23	10.8429			44.87	42.33
		3.87403				3.29845				17.11	27.24			9.4912	17.92
		7.50873				4.15364				7.1108	4.4014			2.0794	11.5786
		4.82919				6.49562				17.78	22.75			2.0794	5.2992
		8.34609				7.63303				2.5727	74.2			11.4175	2.0794
		7.03616				3.74966				2.0794	52.19			8.5194	2.0794
		2.72478				8.42882				15.9257	10.5723			2.0794	54.27
		2.01801				8.64206				49.65	65.65			2.0794	10.8429
		10.009				1.88018				9.4912	16.2247			30.58	27.24
		7.10679				3.87403				2.0794	4.1501			4.9775	4.4014
		13.6828				7.50873				3.0405	13.3501			2.0794	61.85
		4.05645				8.34609				1.6538	7.0476			2.0794	22.75
		4.96897				7.03616				2.0794	53.2			6.9092	52.19
		11.633				2.72478				11.4175	9.727			6.2082	10.5723
		3.70944				2.01801				11.7391	24.02			9.3246	65.65
		3.46194				10.009				8.5194	49.19			2.0794	16.2247
		9.15067				8.05471				2.0794	9.5256			1.6538	13.752
		16.9326				7.10679				2.0794	49.98			44.99	4.1501
		3.67641				13.6828				30.58	38.69			7.5133	13.3501
		7.60737				4.05645				2.0794	5.2992			6.9094	7.0476
		3.0804				4.96897				6.3566	2.0794			26.46	2.0794
		1.97368				11.633				4.9775	6.031			3.5284	53.2
		2.36711				3.70944				2.0794	10.6418			5.702	9.727
		7.58641				3.46194				2.0794	33.24			9.8073	24.02
		5.26194				3.24838				6.9092	40.95			2.0794	25.35
		10.7099				9.15067				6.2082	41.41			2.0794	49.19
		3.82145				16.9326				9.3246	71.64			7.6336	9.5256
		8.37589				3.67641				2.0794	82.98			21.88	49.98
		5.31132				4.87596				1.6538	42.85			2.0794	38.69
		2.13257				7.60737				44.99	6.6049			2.0794	5.2992
		2.76806				3.0804				7.5133	2.0794			6.9092	2.0794
		6.75379				2.61134				6.9094	21.86			2.1811	6.031
		1.55448				2.36711				26.46	48.77			4.9775	10.6418
		9.35206				7.58641				3.5284	2.0794			2.0794	33.24
		7.12097				5.26194				5.702	2.0794			4.8572	40.95
		24.2196				10.7099				9.8073	11.3839			10.1297	41.41
		8.97095				3.82145				2.0794	19.33			4.9775	71.64
		3.9192				8.37589				2.0794	77.91				82.98
		3.20798				5.31132				7.6336	8.8421				42.85
		3.27342				2.13257				21.88	32.78				2.0794
		3.03				2.76806				2.0794	60.98				21.86
		3.47127				6.75379				2.0794	7.3119				48.77
		6.46995				1.55448				6.9092	2.0794				2.0794
		3.00497				7.12097				2.1811	31.79				2.0794
		4.80443				24.2196				4.9775	40.19				11.3839
		5.7903				8.97095				2.0794	7.3699				16.5699
		19.352				3.20798				4.8572	3.6893				19.33
		1.71222				3.27342				10.1297	9.164				77.91
		2.81994				3.03				4.9775	15.375				8.8421
		2.66484				3.47127					10.5723				32.78
		7.39447				6.46995					14.96				60.98
		8.3785				3.00497					2.0794				7.3119
		6.92714				4.80443					65.64				2.0794
		10.0185				5.7903					52.6				31.79
		3.62356				19.352					4.1501				40.19
		12.0325				7.08246					25.22				7.3699
		5.77179				1.71222					34.28				3.6893
		8.76647				2.81994					13.6713				9.164
		7.36026				2.66484					63.47				15.375
		0.432404				7.39447					2.0794				10.5723
		7.09845				8.3785					7.728				14.96
		13.6787				6.92714					3.8907				2.0794
		6.12227				10.0185					5.2993				2.0794
		3.77575				3.62356					5.9614				65.64
		3.85995				12.0325					10.93				52.6
		2.98539				5.77179					33.88				4.1501
		3.98332				8.76647					40.24				45.91
		1.33431				7.36026					23.01				25.22
		2.37526				0.432404					25.02				34.28
		9.09807				13.6787					2.0794				12.7403
		4.58636				2.45878					7.3688				63.47
		5.14497				6.12227					7.1105				2.0794
		3.48557				3.77575					9.8419				7.728
		5.14347				2.84929					56.54				3.8907
		5.17798				3.85995					31.96				5.2993
		3.33393				2.98539					16.0818				5.9614
		1.43942				1.33431					26.83				10.93
		3.70326				2.37526					3.6893				33.88
						9.09807					5.3113				4.4945
						4.58636					21.17				40.24
						5.14497					6.6453				23.01
						3.48557					3.6894				25.02
						5.14347					3.6893				2.0794
						6.1629					41.76				7.3688
						5.17798					15.1889				7.1105
						3.33393					5.335				9.8419
						1.43942					43.73				56.54
						11.8354					2.9931				16.0818
						5.23667					30.25				26.83
						7.11335					17.89				3.6893
						3.70326					17.23				5.3113
											17.64				21.17
											32.64				6.6453
											32.55				3.6894
											2.5727				3.6893
											4.0701				41.76
											34.05				15.1889
											20.27				5.335
											26.67				43.73
											53.68				2.9931
											5.2995				30.25
											28.81				17.89
											2.0794				17.64
											2.0794				32.64
											9.584				32.55
											2.0794				2.5727
											17.13				4.0701
											3.3966				34.05
											13.5507				20.27
											54.69				26.67
											2.0794				53.68
											2.0794				5.2995
											2.0794				28.81
											42.02				6.6049
											8.5193				2.0794
											2.0794				2.0794
											2.0794				2.0794
											18.8				9.584
											5.2993				2.0794
											7.6121				17.13
											6.4673				3.3966
											2.0794				13.5507
											15.7251				54.69
											35.49				2.0794
											8.0366				2.0794
											4.448				3.6893
											12.343				18.22
											61.45				2.0794
											21.69				42.02
											5.2995				8.5193
											43.21				2.0794
											4.1495				2.0794
											25.75				18.8
											8.2784				5.2993
											24.42				7.6121
											3.6893				6.4673
											2.0794				2.0794
											2.5727				15.7251
											5.7595				35.49
											5.9614				8.0366
											8.5349				4.448
											2.0794				12.343
											13.3496				61.45
											6.2082				21.69
											8.1973				5.2995
											35.89				43.21
											44.87				4.1495
											2.0794				25.75
											2.0794				8.2784
											2.0794				24.42
											14.3559				3.6893
											2.0794				2.0794
											12.4865				2.5727
											2.0794				5.7595
											2.0794				5.9614
											17.89				8.5349
											18.18				2.0794
											8.4465				13.3496
											2.5727				6.2082
											39.04				8.1973
											28.32				35.89
											7.1107				2.0794
											21.48				2.0794
											15.1208				3.0405
											16.5691				1.6538
											2.0794				11.7391
											28.04				2.0794
											2.0794				14.3559
											3.5284				2.0794
											9.6407				2.0794
											2.0794				6.3566
											13.7518				12.4865
											2.0794				2.0794
											10.158				2.0794
											2.0794				17.89
											5.2995				8.4465
											2.0794				2.5727
											12.3432				2.0794
															39.04
															28.32
															7.1107
															21.48
															15.1208
															16.5691
															2.0794
															28.04
															2.0794
															3.5284
															9.6407
															2.0794
															2.0794
															13.7518
															3.6894
															2.0794
															10.158
															2.0794
															32.91
															5.2995
															1.6538
															2.0794
															2.0794
															12.3432

## Sheet: Fig4h
	182-CHH		5124-CG		5124-CHG		5124-CHH
WT	0.195035	0.205905	0.920609	0.934886	0.775272	0.790733	0.06257	0.053907
zmdrd1-KO#1	0.024336	0.054997	0.921369	0.913557	0.77267	0.740608	0.023896	0.022934
zmdrd1-KO#2	0.016299	0.019925	0.917368	0.931508	0.74393	0.720341	0.021132	0.024221

## Sheet: Fig4l
	repeat1	repeat2	repeat3	repeat4	repeat5	repeat6	repeat7	repeat8
WT	1.24618	1.13187	0.966105	0.655846					FT	TT
zmdrd1-KO#1	1.76469	1.80608	2.03237	1.881	1.51299	1.36734	1.59292	1.46064	0.724389	0.000912788
zmdrd1-KO#2	1.45013	1.37923	1.19946	1.25211	1.63919	1.52087	1.1377	1.13724	0.442947	0.0249895

## Sheet: Fig5e-f
FPKM(WS2)	+	-	FT	TT	Survival rate(%)	+	-	FT	TT
	5.93271	7.60677	0.00949089	2.69607e-07		27.12	7.8756	6.39465e-08	3.89776e-08
	10.1203	14.6065				15.3617	13.5453
	6.88394	12.1279				6.2082	21.6
	6.62214	12.2081				6.2082	6.2082
	8.65641	13.2376				6.2082	23.63
	8.72953	11.3257				17.78	10.8025
	5.88106	10.8706				6.2082	32.99
	9.72792	10.9469				55.04	13.5505
	8.57327	12.8154				6.9092	31.7
	9.11025	9.01375				22.01	14.0345
	7.82112	14.9632				6.2082	14.5977
	6.96124	8.68103				14.8257	5.1383
	5.88163	10.2729				6.2082	9.3246
	10.8036	14.556				6.2082	5.702
	7.06047	13.9065				6.2082	3.6893
	7.94291	10.4261				25.22	14.3963
	12.1528	11.7347				6.2082	12.7067
	7.52934	11.7587				2.0794	51.07
	8.86555	13.5343				2.0794	67.89
	7.83633	9.8395				3.6893	8.5191
	9.01986	11.1848				2.0794	5.2992
	7.38083	4.57003				5.2995	31.99
	12.9459	6.50356				2.0794	47.43
	18.9798	9.99091				9.8077	68.25
	7.06848	8.43367				2.0794	15.3615
	10.0575	11.9486				2.0794	25.27
	5.36256	8.35806				2.0794	49.72
	10.0019	15.1702				33.68	36.04
	7.40127	9.87233				6.5875	4.308
	6.59722	7.67219				5.2992	1.6538
	11.6727	7.58514				14.6373	23.06
	8.56687	10.8476				3.7077	2.0794
	5.28738	13.6266				2.0794	5.2992
	6.7937	9.37572				2.0794	2.0794
	6.72643	14.2828				36.08	54.27
	8.61392	10.9225				32.82	10.8429
	6.8514	11.1333				16.1476	27.24
	6.05307	17.9369				7.9307	4.4014
	5.92988	20.0857				3.8907	61.85
	8.27738	11.9505				2.0794	74.2
	12.2127	16.2071				3.8907	52.19
	6.93895	10.8895				12.1054	65.65
	7.43645	14.901				17.98	13.3501
	8.8575	12.8378				12.3215	7.0476
	7.66997	7.82431				2.0794	2.0794
	7.11723	21.2103				34.49	53.2
	9.5397	13.7975				42.33	9.727
	7.15822	11.7504				17.92	24.02
	8.73038	14.1211				11.5786	25.35
	5.74276	9.88155				2.0794	49.19
	6.39618	11.9719				22.75	49.98
	8.2183	12.5527				10.5723	38.69
	12.6173	9.89201				16.2247	5.2992
	6.39822	5.8873				13.752	2.0794
	8.04906	14.5578				4.1501	6.031
	8.77065	11.3016				9.5256	10.6418
	5.28754	12.008				6.6049	33.24
	6.19389	12.9911				2.0794	40.95
	12.0778	15.4594				11.3839	41.41
	12.4312	10.8176				16.5699	71.64
	7.99598	8.83114				31.79	42.85
	16.6277	14.5069				7.3699	2.0794
	10.8147	11.4288				10.5723	21.86
	8.11617	6.77211				14.96	48.77
	7.084	8.25342				2.0794	44.26
	9.48732	10.5756				45.91	2.0794
	8.30341	10.4792				32.07	19.33
	9.38281	11.6822				63.47	77.91
	8.2224	9.75515				5.9614	8.8421
	5.45461	5.89432				2.0794	32.78
	8.13098	33.6973				7.3688	60.98
	6.72878	11.8611				7.1105	7.3119
	7.70643	12.031				9.8419	2.0794
	5.72912	11.2894				26.83	40.19
	6.32332	10.5053				6.6453	3.6893
	8.17982	9.4053				3.6894	9.164
	6.32546	9.2596				15.1889	15.375
	8.19453	7.24428				32.55	2.0794
	21.0168	14.3832				34.05	65.64
	13.2991	9.24945				20.27	52.6
	8.31232	6.09007				5.2995	4.1501
	6.74941	10.3215				28.81	25.22
	6.78618	6.07709				6.6049	34.28
	12.0489	17.3367				2.0794	12.7403
	8.00629	12.3539				2.0794	12.669
	6.7771	9.21443				8.9582	13.6713
	18.7596	10.7904				2.0794	2.0794
	11.8822					9.584	7.728
	12.389					6.9094	32.04
	8.4289					3.3966	3.8907
	13.616					17.74	5.2993
	13.3133					13.5507	10.93
	6.84775					4.9775	33.88
	6.97486					4.9775	4.4945
	9.7562					2.0794	40.24
	6.70173					3.5284	23.01
	11.4579					2.0794	25.02
	9.40859					3.6893	3.2869
	12.7652					18.22	56.54
	6.95507					14.8257	31.96
						2.0794	16.0818
						2.0794	3.6893
						2.0794	5.3113
						61.45	21.17
						10.3597	3.6893
						4.8572	3.6893
						43.21	41.76
						59.86	43.73
						4.1495	2.9931
						29.19	30.25
						39.83	17.89
						14.8977	17.23
						2.0794	17.64
						6.3237	32.64
						8.2784	2.5727
						7.1108	4.0701
						2.5727	26.67
						3.6893	53.68
						2.0794	2.0794
						2.0794	17.13
						15.9257	21.43
						2.5727	54.69
						2.0794	6.6685
						49.65	42.02
						13.3496	8.5193
						6.2082	18.8
						8.1973	5.2993
						35.89	7.6121
						9.4912	6.4673
						2.0794	2.0794
						3.0405	15.7251
						1.6538	35.49
						2.0794	8.0366
						11.4175	4.448
						11.7391	12.343
						2.0794	21.69
						14.3559	16.633
						8.5194	6.9496
						2.0794	2.0794
						2.0794	25.75
						6.3566	2.0794
						4.9775	26.23
						2.0794	17.11
						12.4865	17.78
						2.0794	24.42
						6.9092	5.7595
						6.2082	5.9614
						9.3246	8.5349
						2.0794	44.87
						17.89	2.0794
						18.18	2.0794
						8.4465	2.0794
						2.0794	30.58
						1.6538	2.0794
						44.99	39.04
						2.5727	28.32
						2.0794	6.9094
						7.1107	26.46
						21.48	2.0794
						15.1208	7.6336
						2.0794	2.0794
						28.04	32.91
						2.0794	2.0794
						3.5284	10.1297
						9.6407
						7.5133
						3.5284
						9.8073
						2.0794
						13.7518
						3.6894
						2.0794
						2.0794
						2.0794
						10.158
						21.88
						2.0794
						2.0794
						6.9092
						5.2995
						2.1811
						4.9775
						2.0794
						4.8572
						2.0794
						12.3432
						4.9775

## Sheet: Fig5g
	B73	CIMBL55	S2181	S2290
repeat1	0.1703	1.7551	0.172229	1.01613
repeat2	0.111103	2.22085	0.209115	1.52879
repeat3	0.221384	1.32965	0.217373	1.2292

[truncated: 5 more sheets: Fig5h-i, Fig5j, Fig6d, Fig6e, Fig6g]
